# Supplementary material
Source: PubMed Central journal article supplement (PMC3383596)

**Supplementary Material to:**

Yiping Huang, Jun Seop Jeong, Jun Okamura, Myoung Sook-Kim, Heng Zhu, Rafael Guerrero-Preston and Edward A. Ratovitski. Global tumor protein p53/p63 interactome: Making a case for cisplatin chemoresistance. *Cell Cycle* 2012; 11(12); <http://dx.doi.org/10.4161/cc.20863>;  
<http://www.landesbioscience.com/journals/cc/article/20863>

## **Supplemental Legends:**

**Figures S1-2. Ingenuity-based comparison analysis of global TP53 and TP63 interactomes through functions (S1, upper panel) and pathways (S2, lower panel), and STRING-based network analysis (S2).**

**Tables SI-SIII. List of TP53-specific and TP63-specific and TP53/TP63 common protein interactors identified by protein array chip.** Recombinant full-length GST-TP53 (1-393 amino acid residues) and recombinant full-length GST-TP63 (1-680 amino acid residues) were purified from the baculovirus-infected Sf9 insect cells and custom-dissolved in 0.1M sodium phosphate-0.2M NaCl buffer, pH 7.5. 25 $\mu$ g was labeled with Alexa-Fluor-647 microscale protein labeling kit. The labeled protein was purified by a BioRad BioGel P-30 Fine size exclusion column chromatography in phosphate buffer saline, and then used for incubation with custom-made protein chip arrays (~16,368 proteins/chip in duplicate). Signal distribution of the bait protein with a chip was plotted using Microsoft Excel software and cut-offs were defined as maximal peak signals (data not shown).

**Tables SIV-SV. iTRAQ analysis of cisplatin-induced interactome for TP53 (SIV) and  $\Delta$ Np63 $\alpha$  (SV) in sensitive SCC cells.** Quantitative iTRAQ analysis was performed in quadruplicate. Protein complexes from the cells exposed to control medium were labeled with iTRAQ-113, or -114, while protein complexes from the cells exposed to cisplatin were labeled with iTRAQ-115, -116, -117 or -118. Only proteins identified with ITRAQ ratios >1.2 or <0.8 were considered as potential differential interactors.

**Tables SVI-SVII. iTRAQ analysis of cisplatin-induced interactome for TP53 (SVI) and  $\Delta$ Np63 $\alpha$  (SVII) in resistant SCC cells.** Quantitative iTRAQ analysis was performed in quadruplicate. Protein complexes from the cells exposed to control medium were labeled with iTRAQ-113, or -114, while protein complexes from the cells exposed to cisplatin were labeled with iTRAQ-115, -116, -117 or -118. Only proteins identified with ITRAQ ratios  $>1.2$  or  $<0.8$  were considered as potential differential protein interactors.

**Figure S3. The ‘Volcano’ scatter plot representation of interacting protein candidates obtained from the iTRAQ analysis.** ‘Volcano’ plot showing the distribution of candidate TP53 (A)-, and  $\Delta$ Np63 $\alpha$  (B) -associated protein candidates based on fold change and ANOVA p-values. The x-axis shows the  $\text{Log}_2$  of the median normalized iTRAQ ratios between cells transfected with an empty NTAP vector (control) and cells transfected with the NTAP-TP53 (A) or NTAP- $\Delta$ Np63 $\alpha$  (B) expression cassettes. The fold change is plotted according to average NSC values. The vertical dashed lines indicate the threshold fold change required for protein to be considered  $> 1.2$  or  $< 0.8$ . The y-axis shows the  $-\text{Log}_{10}$  of ANOVA p-values. The horizontal dashed line represents a p-value of 0.05. Arrows point to proteins that were most significantly changed. The ratios represent the comparison between sample with an empty NTAP vector and samples with NTAP-TP53 or NTAP- $\Delta$ Np63 $\alpha$ .

**Figure S4. Ingenuity-based presentation of cisplatin-induced TP53 functions (upper panel) and pathways (lower panel) in sensitive (S) and resistant (R) SCC cells.**

**Figure S5. Ingenuity-based presentation of cisplatin-induced  $\Delta$ Np63 $\alpha$  functions (upper panel) and pathways (lower panel) in sensitive (S) and resistant (R) SCC cells.**

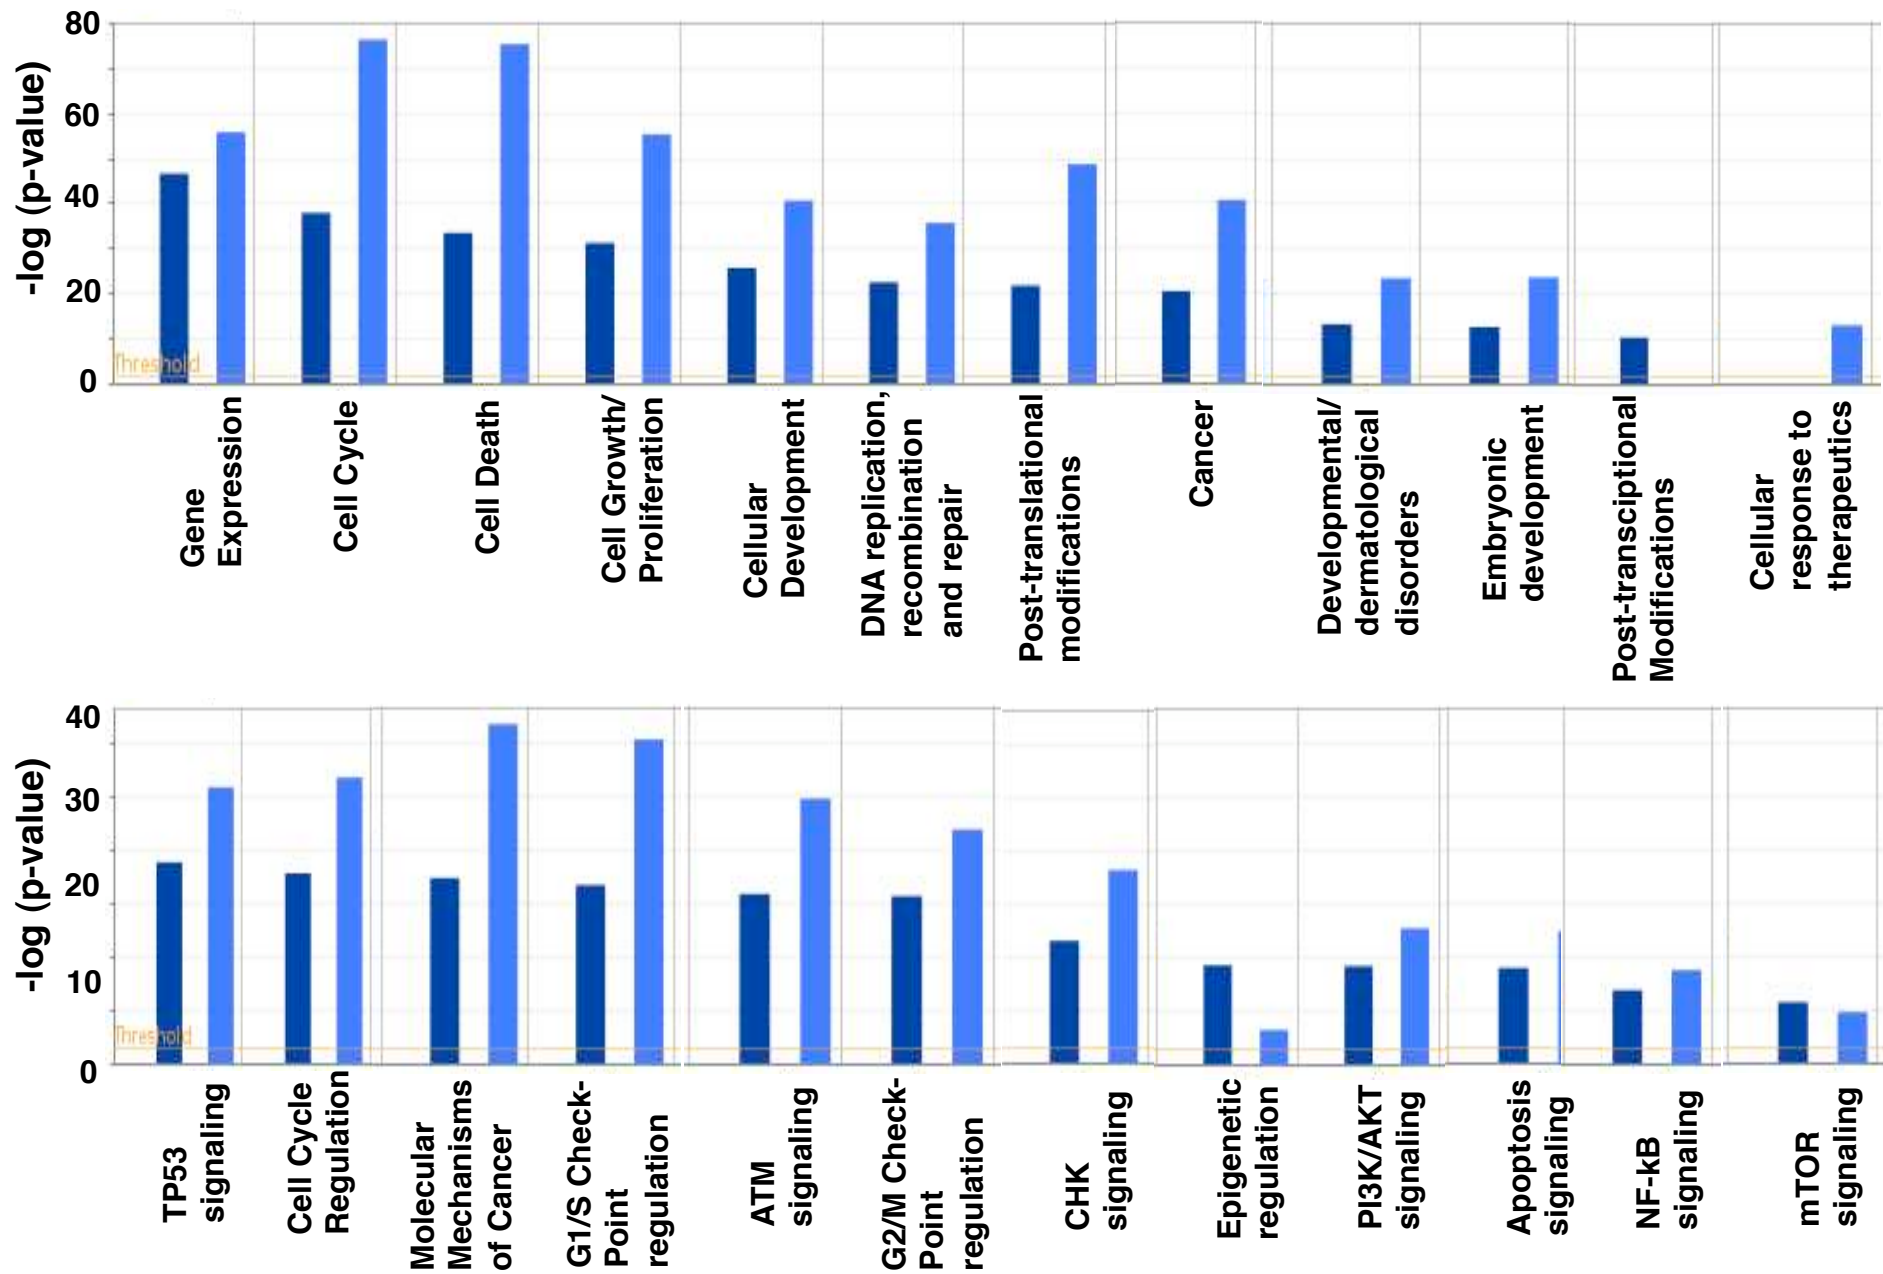

Figure S1.

Comparison Analysis: GLOBAL P53/P63

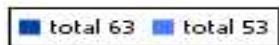

Figure S2

## TP53 family members interactome

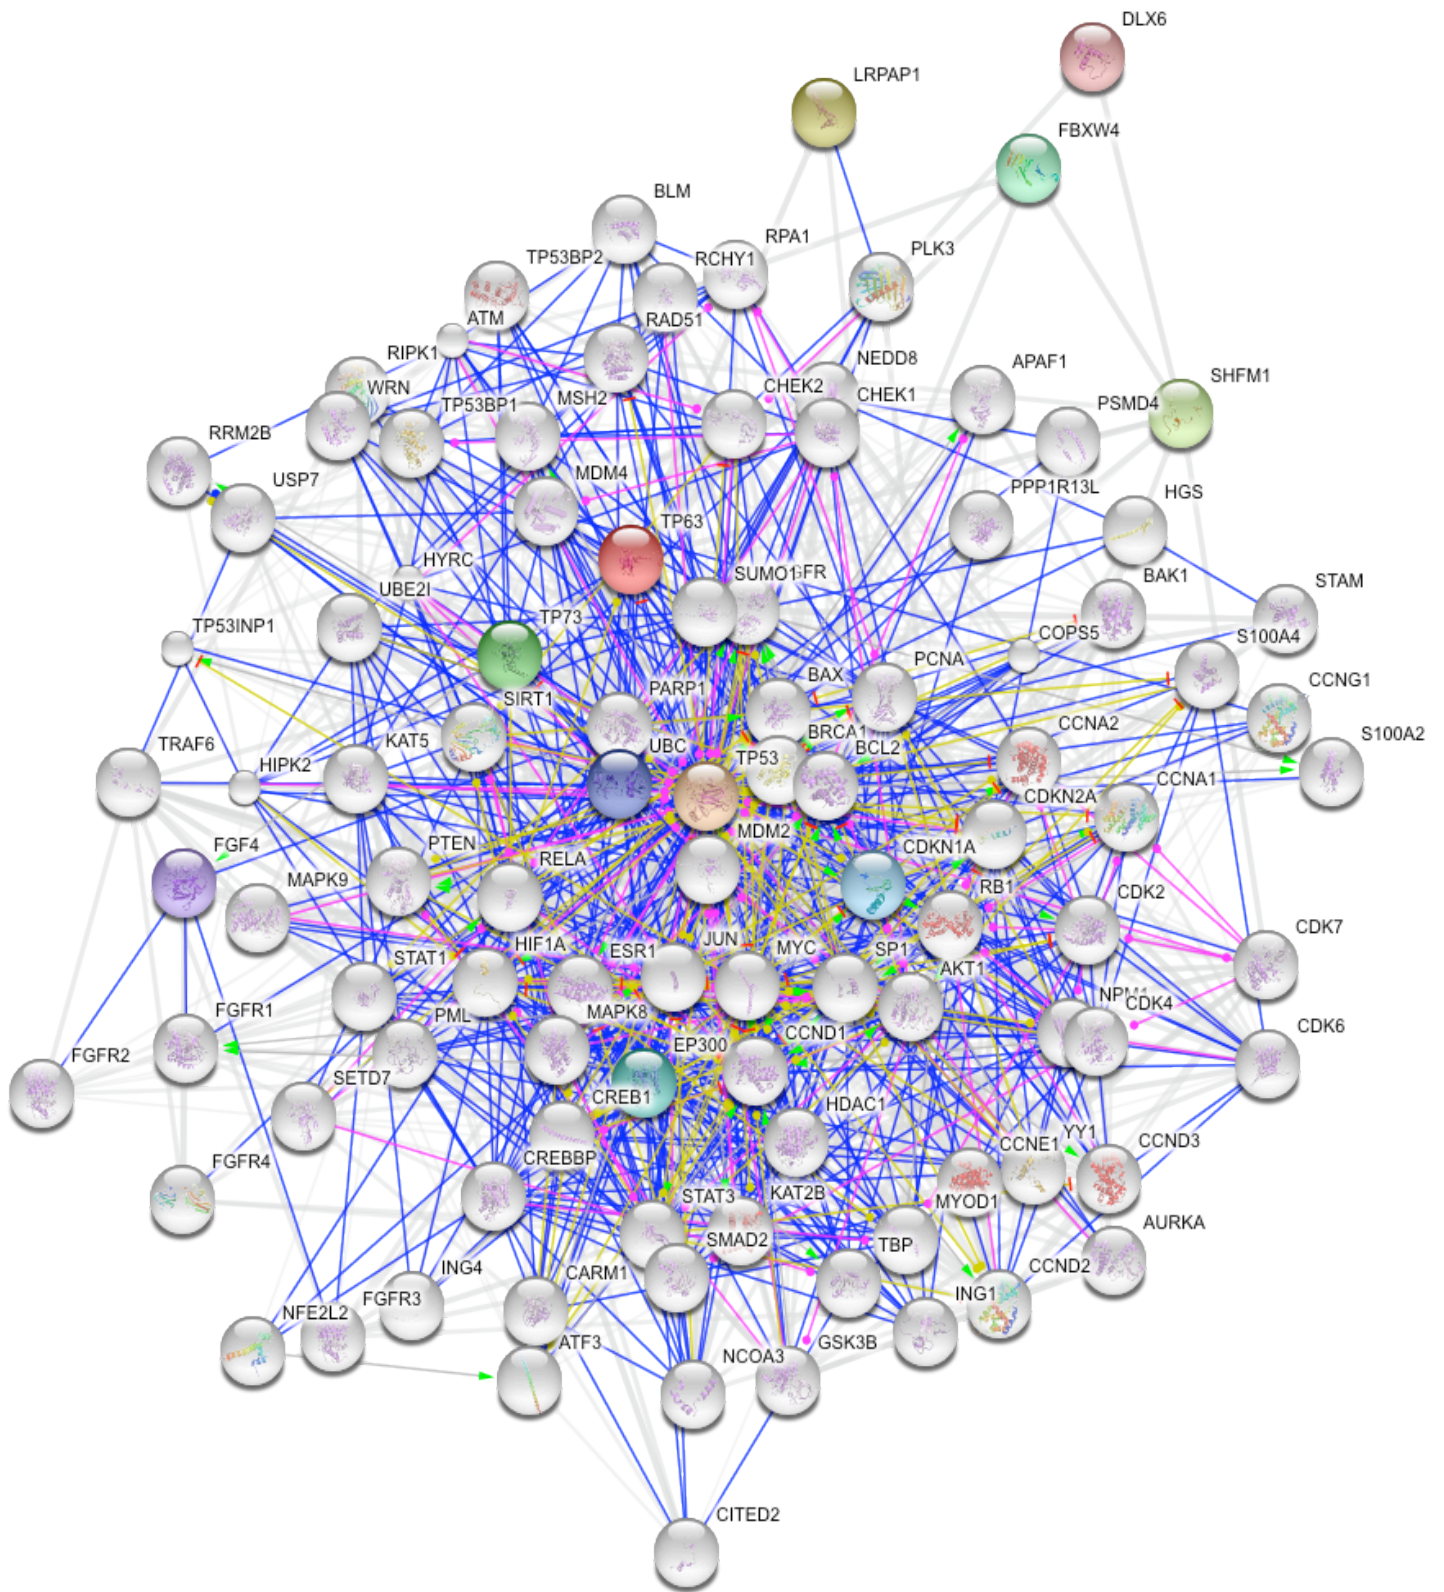

Compiled from the STRING9.0 protein interaction database (<http://string.embl.de/>)

Table SI. TP53-specific interacting proteins

| Protein Name | Gene Description                                       | Accession Number | Sum of Median 635/2 |
|--------------|--------------------------------------------------------|------------------|---------------------|
| PHLDA1       | apoptosis-associated nuclear protein; pleckstrin like  | 123094031        | 13301               |
| SSH1         | protein phosphatase Slingshot homolog 1                | 239047414        | 13292               |
| DUSP23       | dual specificity phosphatase 23                        | 55665709         | 13255               |
| MAT2B        | methionine adenosyltransferase II, beta                | 37182512         | 13245               |
| CSRP3        | cysteine and glycine-rich protein 3                    | 4502893          | 13225               |
| DIMT1L       | DIM1 dimethyladenosine transferase 1-like              | 12803983         | 13213               |
| PPIL3        | peptidylprolyl isomerase (cyclophilin)-like 3          | 14043400         | 13209               |
| PIN1         | peptidylprolyl cis/trans isomerase, NIMA-interacting 1 | 5453898          | 13195               |
| PROZ         | protein Z, vitamin K-dependent plasma glycoprotein     | 57208832         | 13189               |
| UFM1         | ubiquitin-fold modifier 1                              | 55663957         | 13162               |
| ESR2         | estrogen receptor 2 (ER beta)                          | 18848208         | 13152               |
| ADH1B        | alcohol dehydrogenase 1B                               | 34577061         | 13138               |
| PTPN2        | protein tyrosine phosphatase, non-receptor type 2      | 333108231        | 13128               |
| NMRAL1       | NmrA-like family domain containing 1                   | 12804145         | 13115               |
| PDCD6        | programmed cell death 6                                | 29791717         | 13095               |
| PDLIM3       | PDZ and LIM domain 3                                   | 20379875         | 13085               |
| YKT6         | YKT6 v-SNARE homolog                                   | 197692595        | 13026               |
| RAD51        | RAD51 homolog                                          | 49168602         | 12972               |
| STK16        | serine threonine kinase 16                             | 47115287         | 12964               |
| ERBB2        | erb oncoprotein 2                                      | 6857751          | 12940               |
| ERBB4        | erb oncoprotein 4                                      | 219520060        | 12887               |
| SSTR2        | somatostatin receptor 2                                | 4557859          | 12720               |
| CABIN1       | calcineurin-binding protein cabin-1 isoform a          | 313151181        | 12565               |
| HDAC7A       | histone deacetylase 7A                                 | 169234807        | 12355               |
| CCNB1IP1     | cyclin B1 interacting protein 1                        | 116812640        | 12147               |
| ARHGAP32     | Rho GTPase activating protein 32                       | 218083800        | 11800               |
| PTEN         | phosphatase and tensin homolog                         | 66841735         | 11719               |
| PPP3R1       | protein phosphatase 3, regulatory subunit B, alpha     | 48145993         | 11689               |
| RB           | retinoblastoma-associated protein                      | 108773787        | 11665               |
| TANK         | TRAF family member-associated NFKB activator           | 45709985         | 11624               |
| MXD4         | MAX dimerization protein 4                             | 12803751         | 11561               |
| DDX19B       | DEAD (Asp-Glu-Ala-As) box polypeptide 19B              | 62241022         | 11358               |
| SIAH1        | seven in absentia homolog 1                            | 1809248          | 11330               |
| PITPNB       | phosphatidylinositol transfer protein, beta            | 47678613         | 11324               |
| RRAGA        | Ras-related GTP binding A                              | 119579057        | 11316               |
| TRIAP1       | TP53 regulated inhibitor of apoptosis 1                | 7705467          | 11293               |
| NFE2L2       | nuclear factor (erythroid-derived 2)-like 2            | 301072131        | 11274               |
| HSPA1L       | heat shock protein 1L                                  | 124256496        | 11266               |
| MLH1         | DNA mismatch repair protein 1 isoform 1                | 4557757          | 11222               |
| HIPK3        | homeodomain interacting protein kinase 3               | 114796624        | 11211               |
| CDKN1B       | cyclin kinase inhibitor 1B                             | 48146915         | 11179               |
| DDIT2        | DNA damage inducible transcript 2                      | 48146193         | 11127               |
| EDNRB        | endothelin receptor type B                             | 123247892        | 11110               |
| HDAC8        | histone acetyltransferase 8                            | 8132878          | 11066               |
| CDK2AP1      | cyclin-dependent kinase 2 associated protein 1         | 4758188          | 10990               |

|        |                                                    |           |       |
|--------|----------------------------------------------------|-----------|-------|
| HINT1  | histidine triad nucleotide binding protein 1       | 48146213  | 10786 |
| PTGS2  | prostaglandin-endoperoxide synthase 2              | 4678769   | 10752 |
| PFN2   | profilin 2                                         | 16753215  | 10702 |
| MYST1  | histone acetyltransferase MYST1                    | 18032214  | 10596 |
| JPH1   | junctophilin 1                                     | 21735575  | 10488 |
| ATF5   | activating transcription factor 5                  | 13477390  | 10455 |
| RAD6   | ubiquitin-conjugating enzyme E2B (RAD6 homolog)    | 67515433  | 10361 |
| KIF2C  | kinesin family member 2C                           | 55961074  | 10324 |
| CDKN2D | cyclin kinase inhibitor 2D                         | 17981702  | 10139 |
| SNURF  | E3 ubiquitin ligase RNF4 isoform 1                 | 297139777 | 10086 |
| STMN1  | stathmin 1                                         | 122890671 | 9977  |
| PDCD5  | programmed cell death 5                            | 4759224   | 9836  |
| FOXM1  | forkhead box M1                                    | 42544167  | 9806  |
| SMAD3  | SMAD3                                              | 18418623  | 9690  |
| HSPA8  | heat shock protein 8                               | 39645216  | 9674  |
| ATF2   | activating transcription factor 2                  | 20072897  | 9650  |
| DOK1   | DOK1 oncoprotein                                   | 109730337 | 9566  |
| CDC2   | cell division cycle 2 homolog                      | 119574595 | 9459  |
| BHMT2  | betaine-homocysteine S-methyltransferase 2         | 13162290  | 9304  |
| BAG1   | BCL2-associated athanogene                         | 55661641  | 9274  |
| ITGB1  | intergrin B1                                       | 89243632  | 9273  |
| SMAD2  | SMAD family member 2                               | 2967646   | 9263  |
| CCNB1  | cyclin B1                                          | 14327896  | 9241  |
| MDM4   | p53 binding protein                                | 55960021  | 9176  |
| CSN3   | COP9 signalosome complex subunit 3 isoform 1       | 23238222  | 8917  |
| AREG   | amphiregulin                                       | 179040    | 8898  |
| FYN    | tyrosine-protein kinase Fyn isoform a              | 4503823   | 8869  |
| ERCC8  | excision repair protein 8                          | 4557467   | 8803  |
| KPNA4  | importin 4                                         | 4504901   | 8795  |
| GPRIN2 | G protein regulated inducer of neurite outgrowth 2 | 112821688 | 8690  |
| NAT1   | N-acetyltransferase 1                              | 114053975 | 8526  |
| MRE11A | MRE11 meiotic recombination 11 homolog A           | 5031923   | 8351  |
| ARF6   | ADP-ribosylation factor 6                          | 14286244  | 8288  |
| JMY    | junction-mediating and -regulatory protein         | 289547556 | 8276  |
| PAK    | p21 protein kinase                                 | 780806    | 8232  |
| PDRG1  | p53 and DNA damage regulated 1                     | 18079254  | 8213  |
| PML    | promyelocytic leukemia protein                     | 8815562   | 8186  |
| MAP3K1 | mitogen-activated kinase 3 kinase 1                | 153945765 | 8153  |
| REPS1  | RALBP1 associated Eps domain containing 1          | 220742488 | 8121  |
| SSR3   | translocon-associated protein subunit gamma        | 6005884   | 8052  |
| TOP2A  | DNA topoisomerase 2 alpha                          | 19913406  | 7948  |
| TOPORS | TOPO I binding E3 protein ligase                   | 55662286  | 7795  |
| IMB1   | importin subunit beta-1                            | 19923142  | 7637  |
| MSX1   | MSH homeobox protein 1                             | 45595674  | 7541  |
| NQO1   | NADPH dehydrogenase, quinone 1                     | 78070376  | 7495  |
| SMAD4  | SMAD family member 4                               | 13603414  | 7371  |
| APEX1  | APEX DNA repair nuclease                           | 18375505  | 7267  |
| BANP   | BTG associated nuclear protein                     | 291084801 | 7186  |
| KPNA2  | karyopherin alpha 2                                | 15865453  | 7082  |

|          |                                                        |           |      |
|----------|--------------------------------------------------------|-----------|------|
| BRCA2    | breast cancer 2                                        | 1161384   | 7014 |
| IL1      | interleukin 1 proprotein                               | 27894330  | 6979 |
| GPX1     | glutathione peroxidase 1                               | 41406084  | 6922 |
| IGFBP3   | insulin-like growth factor-binding protein 3 isoform a | 62243248  | 6790 |
| TOP2B    | DNA topoisomerase 2-beta                               | 19913408  | 6734 |
| CASP1    | caspase 1                                              | 34783606  | 6664 |
| PKA      | protein kinase A gamma-subunit                         | 189987    | 6619 |
| PKC      | protein kinase C beta type isoform                     | 47157322  | 6555 |
| RAS      | RAF proto-oncogene serine/threonine-protein kinase     | 4506401   | 6432 |
| PPP1R13B | protein phosphatase 1 regulatory subunit 13B           | 187953261 | 6396 |
| TP53INP1 | TP53 inducible nuclear protein 1                       | 15150807  | 6339 |
| AR       | androgen receptor                                      | 124375976 | 6243 |
| CSN6     | COP9 signalosome complex subunit 6                     | 34147637  | 6182 |
| BAK      | bcl-2 homologous antagonist/killer                     | 4502363   | 6163 |
| AURKA    | aurora kinase A                                        | 126541216 | 6055 |
| BCL2     | B-cell lymphoma 2 protein                              | 72198189  | 6017 |
| COX6B1   | cytochrome C oxidase                                   | 4502985   | 5992 |
| DAPK1    | death-associated protein kinase 1                      | 219517989 | 5975 |
| TSC1     | tuberous sclerosis 1 protein                           | 80476713  | 5934 |
| CCNE1    | G1/S-specific cyclin-E1 isoform 1                      | 17318559  | 5909 |
| IFNA2    | interferon alpha 2                                     | 119579015 | 5830 |
| MGA      | MAX gene associated                                    | 256017163 | 5779 |
| FLNC     | filamin C gamma                                        | 119604097 | 5721 |
| RAB5     | ras-related small GTP binding protein Rab5             | 642532    | 5693 |
| NRG1     | neuregulin 1                                           | 47496523  | 5667 |
| TAOK3    | serine/threonine-protein kinase TAO3                   | 148746218 | 5576 |
| ATR      | ataxia telangiectasia and Rad3 related                 | 62087274  | 5455 |
| TLE1     | transducin-like enhancer of split 1                    | 55959469  | 5419 |
| MYB      | MYB oncoprotein                                        | 56203202  | 5392 |
| CDC37    | cell division cycle 37                                 | 49457492  | 5364 |
| NTRK1    | neurotrophic tyrosine kinase receptor 1                | 223459656 | 5299 |
| SRC      | src protein kinase                                     | 15079460  | 5272 |
| IGF1R    | insulin-like growth factor 1 receptor                  | 219517967 | 5244 |
| PPP1CC   | protein phosphatase 1 catalytic subunit, gamma         | 4506007   | 5166 |
| RAD17    | cell cycle checkpoint protein RAD17 isoform 1          | 19718796  | 5126 |
| PRPK     | TP53 regulating kinase                                 | 42542637  | 5097 |
| RASSF1   | Ras associated (RalGS/AF-6) family 1                   | 9055143   | 5036 |
| RBBP8    | Rb binding protein 8                                   | 21040399  | 4916 |
| AIFM1    | apoptosis inducing factor, mitochondrial               | 4757732   | 4861 |
| BTRC     | beta transducin repeat containing protein              | 57209476  | 4781 |
| POU4F2   | POU domain, class 4, transcription factor 2            | 110347455 | 4742 |
| E2F3     | E2F transcription factor 3                             | 4503433   | 4714 |
| SMAD1    | SMAD family member 1                                   | 1654323   | 4686 |
| TLE2     | transducin-like enhancer 2                             | 21361151  | 4639 |
| PTK2     | protein tyrosine kinase 2                              | 22382094  | 4593 |
| TDG      | thymine DNA glycosylase                                | 23267188  | 4587 |
| ERBB3    | erb oncoprotein 3                                      | 12803739  | 4499 |
| FNTA     | farnesyltransferase, isoform alpha                     | 34782840  | 4421 |
| NCAM1    | neural cell adhesion molecule 1                        | 94420689  | 4387 |



|          |                                                     |           |      |
|----------|-----------------------------------------------------|-----------|------|
| MAP2K2   | mitogen-activated kinase kinase 2                   | 13489054  | 4269 |
| SERPINA1 | serpin peptidase inhibitor A1                       | 15080499  | 4222 |
| TYRP1    | tyrosinase-related protein 1                        | 55661394  | 4159 |
| CABYR    | Ca-binding Y-phosphorylation-regulated protein      | 24797108  | 4098 |
| IKZF1    | IKAROS family zing finger protein                   | 17390815  | 4008 |
| AHR      | aryl hydrocarbon receptor                           | 47682748  | 3932 |
| MAX      | MAX oncoprotein                                     | 34470     | 3883 |
| BCL2L1   | B-cell lymphoma 2-lke 1                             | 56204045  | 3771 |
| CASP8    | caspase 8                                           | 45751586  | 3721 |
| CCNT2    | cyclin T2                                           | 89130720  | 3679 |
| CDK17    | cyclin-dependent kinase 17                          | 37595545  | 3623 |
| DST      | dystonin                                            | 56203389  | 3532 |
| FASN     | fatty acid synthase                                 | 38196977  | 3498 |
| VEGFA    | vascular endothelial growth factor A                | 110611814 | 3412 |
| ING1     | inhibitor of growth family, member 1                | 55957788  | 3387 |
| BARD1    | BRCA1-associated RING domain 1, BARD1               | 32949402  | 3298 |
| GPS2     | G protein pathway suppressor 2                      | 4758472   | 3243 |
| KLF6     | Krueppel-like factor 6 isoform A                    | 37655157  | 3221 |
| ANM1     | protein arginine N-methyltransferase 1 isoform 1    | 154759421 | 3201 |
| PFDN5    | prefoldin subunit 5                                 | 22202633  | 2956 |
| RAD9A    | cell cycle checkpoint control protein RAD9A         | 4759022   | 2834 |
| MDC1     | mediator of DNA damage checkpoint 1                 | 168985671 | 2802 |
| CCNA2    | cyclin A2                                           | 47115321  | 2789 |
| CDK3     | cyclin-dependent kinase 3                           | 4557439   | 2734 |
| SP3      | Sp3 transcription factor                            | 38373693  | 2716 |
| SP2      | Sp2 transcription factor                            | 125625357 | 2676 |
| APC      | adenomatous polyposis coli protein                  | 306922386 | 2643 |
| PEA15    | phosphoprotein enriched in astrocytes               | 55957229  | 2589 |
| NEEP21   | neuron-specific protein family member 1             | 91932788  | 2556 |
| BCLX     | bcl-2-like protein 1 isoform 1                      | 20336335  | 2532 |
| E2F6     | E2F transcription factor 6                          | 109637795 | 2513 |
| BRE      | BRCA1-A complex subunit BRE isoform 1               | 21361171  | 2487 |
| MAD3L    | MAD3/BUB1-related protein kinase                    | 2981235   | 2449 |
| HSP90B   | heat shock protein 90B                              | 20149594  | 2432 |
| STRADB   | STE20-related kinase adaptor beta                   | 13027388  | 2367 |
| DHX9     | dead box polypeptide 9                              | 187952519 | 1712 |
| PSMD2    | proteasome 26 subunit, non-ATP-ase 2                | 25777602  | 1656 |
| BTK      | Bruton tyrosine kinase                              | 4557377   | 1599 |
| SETD7    | histone-lysine N-methyltransferase SETD7            | 18139549  | 1587 |
| PTTG1    | pituitary tumor-transforming 1                      | 118764207 | 1543 |
| FAK1     | focal adhesion kinase 1 isoform a                   | 24476013  | 1523 |
| BRCC3    | RCA1/BRCA2-containing complex, subunit 3            | 150171085 | 1479 |
| GNL3     | guanine nucleotide-binding protein-like 3 isoform 1 | 45593130  | 1446 |
| FXYD6    | FXYD domain-containing ion transport regulator 6    | 258679518 | 1405 |
| CDH3     | P-cadherin                                          | 116283998 | 1386 |
| STK4     | serine/threonine kinase 4                           | 66347271  | 1371 |
| THAP8    | THAP domain-containing protein 8                    | 22749337  | 1368 |
| ALOX12   | arachidonate 12-lipoxygenase                        | 41324132  | 1356 |
| ANXA3    | annexin 3                                           | 4826643   | 1354 |

|          |                                                          |           |      |
|----------|----------------------------------------------------------|-----------|------|
| GHR      | glucocorticoid receptor                                  | 4503993   | 1351 |
| BTBD2    | BTB/POZ domain-containing protein 2                      | 20127580  | 1348 |
| RFA1     | E3 ubiquitin-protein ligase NEDD4-like isoform 1         | 222352086 | 1344 |
| HSP27    | heat shock protein 27                                    | 11036357  | 1342 |
| CDH1     | E-cadherin                                               | 146327038 | 1339 |
| WDR33    | WD repeat-containing protein 33 isoform 1                | 56243590  | 1337 |
| LAMA4    | laminin, alpha 4                                         | 55960320  | 1336 |
| SCAM1    | SORBS3 sorbin and SH3 domain containing 3                | 127799395 | 1335 |
| WWOX     | WW domain-containing oxidoreductase isoform 1            | 7706523   | 1334 |
| HTT      | huntingtin                                               | 90903231  | 1333 |
| ASNA1    | ATPase ASNA1                                             | 50428938  | 1332 |
| VRK1     | serine/threonine-protein kinase VRK1                     | 4507903   | 1331 |
| DDX5     | dead box polypeptide 5                                   | 197692465 | 1330 |
| SYVN1    | E3 ubiquitin-protein ligase synoviolin isoform a         | 27436925  | 1329 |
| CASP3    | caspase 3                                                | 14790115  | 1328 |
| APTX     | aprataxin                                                | 55958014  | 1328 |
| FBLN4    | EGF-containing fibulin-like extracellular matrix protein | 14714634  | 1328 |
| HSPA8    | heat shock protein 8                                     | 48257068  | 1327 |
| NUCL     | lysosomal acid lipase/cholesteryl esterase               | 187152    | 1326 |
| MAP1LC3B | microtubule-associated proteins 1A/1B light chain 3B     | 12383056  | 1326 |
| HUWE1    | HECT, UBA and WWE domain containing 1                    | 57210076  | 1323 |
| RAB4A    | member RAS oncogene family                               | 56205909  | 1323 |
| RIR2B    | ribonucleoside-diphosphate reductase subunit M2 B        | 42544136  | 1322 |
| GIT2     | G protein-coupled recep. kinase interacting ArfGAP 2     | 49065562  | 1322 |
| TRAK1    | trafficking protein, kinesin binding 1                   | 45359873  | 1322 |
| ASH2L    | ASH-like protein 2                                       | 4210447   | 1321 |
| OGT      | O-GlcNAc transferase p110 subunit                        | 32307148  | 1320 |
| RABGGTA  | Rab geranylgeranyltransferase, alpha subunit             | 49456551  | 1319 |
| CDC123   | cell division cycle 123 homolog                          | 55960598  | 1319 |
| MPPE1    | metallophosphoesterase 1                                 | 12804049  | 1319 |
| DNAJB6   | DnaJ (Hsp40) homolog, subfamily B, member 6              | 49065422  | 1318 |
| CAPZB    | capping protein (actin filament) muscle Z-line, beta     | 56417839  | 1318 |
| PCID2    | PCI domain containing 2                                  | 55957808  | 1318 |
| BYSL     | bystin-like protein                                      | 29792064  | 1317 |

Table SII. TP63 interacting proteins

| Protein Name | Protein Description                                      | Accession Number | Sum of Media 635/2 |
|--------------|----------------------------------------------------------|------------------|--------------------|
| LRRC8D       | leucine rich repeat containing 8 family, member D        | 55663683         | 24113              |
| OVOL2        | transcription factor Ovo-like 2; zinc finger protein 339 | 55957199         | 21644              |
| HNRNPA/B     | heterogeneous RNP protein A/B                            | 55956919         | 20017              |
| SF3B4        | splicing factor 3b, subunit 4                            | 55960587         | 19807              |
| RUNX2        | Runt-related transcription factor 2                      | 56205907         | 19310              |
| LIN7B        | lin-7 homolog B                                          | 11545920         | 19079              |
| AMBRA1       | autophagy/beclin-1 regulator 1                           | 50843827         | 18775              |
| POLR2D       | polymerase (RNA) II (DNA directed) polypeptide D         | 62739756         | 18735              |
| SSRP1        | structure specific recognition protein 1                 | 13477285         | 18640              |
| CHMP1B       | chromatin modifying protein 1B                           | 119621980        | 18541              |
| WIPF1        | WAS/WASL interacting protein family, member 1            | 38373695         | 18359              |
| TWF2         | twinfilin, actin-binding protein, homolog 2              | 16741225         | 18351              |
| LRRFIP1      | leucine rich repeat (in FLII) interacting protein 1      | 80474548         | 18328              |
| TRAPPC2L     | trafficking protein particle complex 2-like              | 7706429          | 18205              |
| ITCH         | E3 ubiquitin-protein ligase Itchy homolog                | 27477109         | 18190              |
| CRABP2       | cellular retinoic acid binding protein 2                 | 315013542        | 18027              |
| ARIH2        | E3 ubiquitin-protein ligase ARIH2                        | 5453557          | 17996              |
| EIF4A2       | eukaryotic translation initiation factor 4A2             | 16740867         | 17897              |
| POP7         | processing of precursor 7, ribonuclease P/MRP subunit    | 12655151         | 17789              |
| PELI2        | pellino 2 protein                                        | 10242353         | 17573              |
| SHMT1        | serine hydroxymethyltransferase 1                        | 22547186         | 16935              |
| EFTUD2       | 116 kDa U5 small nuclear RNP component isoform a         | 217272892        | 16789              |
| GFRA1        | GDNF family receptor alpha 1                             | 4885269          | 16500              |
| MAP1LC3B     | microtubule-associated protein 1 light chain 3 beta      | 12383056         | 16441              |
| FGFR2        | fibroblast growth factor receptor 2                      | 1296625          | 16382              |
| ZMYND11      | zinc finger, MYND-type containing 11                     | 168984627        | 16290              |
| EIF3G        | eukaryotic translation initiation factor 3, subunit G    | 49472822         | 15647              |
| SNAPC1       | small nuclear RNA activating complex, polypeptide 1      | 4507101          | 15334              |
| PRAME        | preferentially expressed antigen in melanoma             | 46249373         | 15252              |
| DERL2        | degradation in endoplasmic reticulum protein 2           | 31455614         | 15222              |
| IFNAR2       | interferon beta receptor type 2                          | 49456591         | 14991              |
| PTRF         | polymerase I and transcript release factor               | 42734430         | 14762              |
| CLP1         | cleavage and polyadenylation factor I subunit, homolog   | 12653353         | 14410              |
| HNRPUL1      | heterogeneous nuclear ribonucleoprotein U-like 1         | 21536326         | 14345              |
| SSBP3        | single stranded DNA binding protein 3                    | 56204255         | 14313              |
| RCVRN        | cancer-associated retinopathy protein                    | 326205427        | 14175              |
| CETN2        | centrin, EF-hand protein, 2                              | 119593306        | 14100              |
| HINFP        | histone H4 transcription factor                          | 39725948         | 14017              |
| MIF4GD       | MIF4G domain-containing protein isoform 1                | 335334986        | 13823              |
| SOCS6        | suppressor of cytokine signaling 6                       | 21450785         | 13582              |
| NECAP1       | NECAP endocytosis associated 1                           | 84570053         | 13515              |
| APOBEC1      | apolipoprotein B mRNA editing enzyme catal. polyp. 1     | 66365008         | 13269              |
| SNRPA        | U1 small nuclear ribonucleoprotein A                     | 4759156          | 13158              |
| KDELCL1      | KDEL motif-containing ER protein 1                       | 55957419         | 13090              |
| SREBF1       | sterol regulatory element binding transcription factor 1 | 52630419         | 12999              |

|           |                                                    |           |       |
|-----------|----------------------------------------------------|-----------|-------|
| STAU2     | stauflen, RNA binding protein, homolog 2           | 14249967  | 11063 |
| KRT6A     | keratin 6A                                         | 141795139 | 10123 |
| SNUPN     | RNA U transporter 1, snuportin 1                   | 110611149 | 9897  |
| ULK2      | serine/threonine-protein kinase ULK2 (ATG1B)       | 217330559 | 9454  |
| GEMIN6    | gem (nuclear organelle) associated protein 6       | 41393577  | 9121  |
| TRIP13    | thyroid hormone receptor interactor 13             | 48145605  | 8956  |
| SHFM1     | split hand/foot malformation (ectrodactyly) type 1 | 51094880  | 8012  |
| ODAM      | odontogenic, ameloblast associated                 | 17389519  | 7934  |
| ATG4B     | cysteine protease ATG4B isoform a                  | 47132611  | 7656  |
| RPAIN     | RPA interacting protein                            | 13325269  | 7453  |
| STAM      | signal transducing adaptor molecule                | 4507249   | 6954  |
| HNRPA0    | heterogeneous nuclear ribonucleoprotein A0         | 5803036   | 6764  |
| DKC1      | dyskeratosis congenita 1, dyskerin                 | 14603090  | 6755  |
| DLX3      | distal-less homeobox 3                             | 4885185   | 6734  |
| MTF1      | metal-regulatory transcription factor 1            | 119627717 | 6674  |
| CBFA2T3   | core-binding factor, runt domain alpha             | 28872803  | 6633  |
| TARDBP    | TAR DNA binding protein                            | 56204104  | 6609  |
| RUNX1     | Runt-related transcription factor 1                | 223459612 | 5912  |
| BRD2      | bromo-domain containing protein 2                  | 168985018 | 5768  |
| HDAC9     | histone deacetylase 9                              | 85057087  | 5526  |
| ATG14     | beclin 1-associated autophagy-related protein 14   | 219842182 | 5508  |
| GOPC      | Golgi-associated PDZ and coil domain               | 55710286  | 5409  |
| DDIT3     | DNA damage inducible transcript 3                  | 304282231 | 5391  |
| KAT2B     | histone acetyltransferase 2B                       | 40805843  | 5361  |
| DEK       | DEK oncoprotein                                    | 123231494 | 5356  |
| SCAF4     | SR-related CTD associated factor 4                 | 40789229  | 5341  |
| CHD4      | chromodomain helicase DNA binding protein 4        | 51599156  | 5324  |
| RNPC1     | RNA-binding protein 38 isoform a                   | 34577107  | 5321  |
| STAT3     | signal transduction activator of transcription 3   | 21618340  | 5319  |
| PPP2R5A   | B56 regulatory subunit, protein phosphatase 2A     | 315113860 | 5299  |
| ARID1A    | AT rich interactive domain 1A                      | 56205619  | 5257  |
| CTNNB1    | catenin beta                                       | 148233338 | 5232  |
| SF1       | splicing factor 1                                  | 42544130  | 5218  |
| STXBP4    | syntaxin-binding protein 4                         | 63999048  | 5217  |
| DNMT3A    | DNA methyltransferase 3A                           | 28559069  | 5215  |
| SOX2      | SRY (sex determining region Y)-box 2               | 119598760 | 5214  |
| SNAPC4    | small nuclear RNA activating polypeptide 4         | 92859678  | 5211  |
| EZH2      | enhancer of zeste homolog 2                        | 1438064   | 5195  |
| LSH/HELLS | lymphoid-specific helicase                         | 21914927  | 5166  |
| SMARCC1   | SWI/SNF regulator of chromatin 1                   | 188536047 | 5146  |
| NFKBIA    | NF-kappa-B inhibitor alpha                         | 10092619  | 5132  |
| FUBP1     | far upstream element binding protein 1             | 17402900  | 5108  |
| ZEB1      | zinc finger E-box binding homeobox 1               | 55957123  | 5100  |
| IRF6      | interferon regulatory factor 6                     | 188536047 | 5090  |
| NRIP1     | nuclear receptor interacting protein 1             | 57232746  | 5080  |
| HEY2      | hairly/enhancer of split 2                         | 6912414   | 5029  |
| DNMT3B    | DNA methyltransferase 3B                           | 5748522   | 5026  |
| CTDP1     | RNA polymerase II phosphatase 1                    | 67188445  | 5019  |
| MECP2     | Methyl CpG binding protein 2                       | 4826830   | 5010  |

|         |                                                          |           |      |
|---------|----------------------------------------------------------|-----------|------|
| ATF7IP2 | activating transcription factor 7 interacting protein 2  | 38569430  | 5008 |
| GAB2    | GRB2-associated-binding protein 2 isoform a              | 18105042  | 5004 |
| UFD2A   | ubiquitin conjugation factor E4 B isoform 1              | 157739864 | 4998 |
| NAC1    | nucleus accumbens-associated protein 1                   | 16418383  | 4998 |
| FBW7    | F-box/WD repeat-containing protein 7 isoform 1           | 16117781  | 4996 |
| N4BP1   | NEDD4-binding protein 1                                  | 48928019  | 4994 |
| HNRNPK  | heterogeneous nuclear ribonucleoprotein K                | 55958547  | 4989 |
| NONO    | non-POU domain contain, octamer bind                     | 224028244 | 4981 |
| STAT2   | signal transduction activator of transcription 2         | 4885615   | 4975 |
| ZNF24   | zinc finger protein 24                                   | 190610012 | 4962 |
| TAF1B   | TBP-associated factor RNA polymerase I, subunit B        | 205360987 | 4903 |
| CHUK    | inhibitor of nuclear factor kappa-B kinase subunit alpha | 62241001  | 4895 |
| SBLP    | histone RNA hairpin-binding protein                      | 5729862   | 4890 |
| BRF1    | transcription factor IIIB 90 kDa subunit isoform 1       | 22035556  | 4886 |
| NIR     | nucleolar complex protein 2 homolog                      | 157694511 | 4881 |
| EPHA3   | ephrin receptor EPHA3 complete form                      | 12003435  | 4877 |
| SYNCRIP | synaptotagmin binding, cyto-RNA interacting protein      | 228008291 | 4853 |
| DMAP1   | DNMT1 associated protein 1                               | 56203069  | 4511 |
| CARM1   | histone-arginine methyltransferase CARM1                 | 40288288  | 4443 |
| TCF12   | transcription factor 12                                  | 46370082  | 4401 |
| HBP1    | HMG-box transcription factor 1                           | 18490183  | 4394 |
| KRT1    | keratin 1                                                | 11935049  | 4387 |
| HUS1    | Hus1 checkpoint homolog                                  | 4758576   | 4323 |
| HNRNPR  | heterogeneous RNP R                                      | 56203529  | 4298 |
| TAF9B   | TAF9B RNA polymerase II                                  | 20070280  | 4256 |
| ARID3A  | AT rich interactive domain 3A                            | 20070280  | 4235 |
| HNRNPL  | heterogeneous RNP L                                      | 52632383  | 4201 |
| TTF1    | transcription termination factor, RNA polymerase I       | 33356179  | 4197 |
| RECQ3   | RecQ helicase 3                                          | 110735439 | 4143 |
| KLF4    | Kruppel-like factor 4                                    | 220732387 | 4066 |
| RCOR1   | Rest corepressor 1                                       | 7661892   | 3678 |
| RPH3AL  | rab effector Noc2 isoform 1                              | 298676510 | 3599 |
| KRT9    | keratin 9 (epidermolytic palmoplantar keratoderma)       | 119581148 | 3521 |
| CLDN1   | claudin 1                                                | 4559278   | 3513 |
| SHISA5  | Scotin                                                   | 33876247  | 3504 |
| TLR3    | toll-like receptor 3 precursor                           | 4507531   | 3431 |
| NTN1    | netrin 1                                                 | 119610438 | 3415 |
| EPHA2   | EPH receptor A2                                          | 22713539  | 3363 |
| IGF2BP1 | insulin-like growth factor 2 mRNA-binding protein 1      | 56237027  | 3337 |
| TRAF4   | TNF receptor-associated factor 4                         | 22027622  | 3324 |
| DEC     | deleted in esophageal cancer 1                           | 2308997   | 3287 |
| MAP1A   | microtubule-associated protein 1A                        | 95147555  | 3221 |
| POU2F3  | POU domain, class 2, transcription factor 3              | 148664218 | 3199 |
| SPEN    | spen-homolog transcription regulator                     | 55665414  | 3121 |
| SPATA18 | SPATA18 protein                                          | 23138670  | 3099 |
| KRT5    | keratin 5                                                | 18999435  | 3078 |
| NCL     | nucleolin                                                | 31455187  | 3055 |
| HLTF    | helicase-like transcription factor                       | 21071054  | 3023 |
| CHTOP   | chromatin target of PRMT1 protein isoform 1              | 28875797  | 2733 |

Table SIII. TP53/TP63 common interacting proteins

| Protein Name | Protein Description                                     | Accession Number | TP53 Signals Sum of Median 635/2 | TP63 Signals Sum of Median 635/2 |
|--------------|---------------------------------------------------------|------------------|----------------------------------|----------------------------------|
| H3           | histone H3                                              | 386772           | 13074                            | 18434                            |
| BECN1        | Autophagy-like 6 protein, beclin 1                      | 4502395          | 12997                            | 18327                            |
| BCCIP        | BRCA2 and CDKN1A interacting protein, isoform alpha     | 7706581          | 12877                            | 17001                            |
| H4           | histone H4                                              | 77539758         | 12842                            | 16953                            |
| TP53         | tumor protein p53                                       | 187233962        | 12828                            | 15088                            |
| SAFB1        | scaffold attachment factor B, isoform 1                 | 321267469        | 12807                            | 15072                            |
| AKT1         | AKT oncoprotein 1                                       | 18027298         | 12789                            | 14779                            |
| CHEK2        | CHK1 checkpoint kinase 2                                | 47678367         | 12775                            | 14406                            |
| TP63         | tumor protein p63                                       | 31543818         | 12745                            | 14363                            |
| SIRT5        | NAD-dependent acetylase, sirtuin 5                      | 6912664          | 12739                            | 14067                            |
| H2AFZ        | H2A histone family, member Z                            | 74355514         | 12660                            | 13811                            |
| CDC42        | cell division cycle 42 homolog                          | 4757952          | 12646                            | 13689                            |
| IGFBP6       | insulin-like growth factor binding protein 6            | 11321593         | 12627                            | 13631                            |
| STK11        | serine-threonine kinase 11, LKB1                        | 4507271          | 12602                            | 13610                            |
| SUMO1        | SMT3 suppressor of mif two 3 homolog 1                  | 42490984         | 12576                            | 13330                            |
| TAF6L        | p300/CBP-associated factor-associated factor 6L         | 5453844          | 12548                            | 13113                            |
| WWP2         | WW domain containing E3 ubiquitin protein ligase 2      | 40806207         | 12526                            | 13064                            |
| RAN          | RAN, member RAS oncogene family                         | 47496641         | 12505                            | 12092                            |
| GRB2         | growth factor receptor-bound protein 2                  | 3850302          | 12494                            | 11934                            |
| NFIC         | nuclear factor I/C (CCAAT-binding transcription factor) | 15082410         | 12482                            | 11275                            |
| CDKN2A       | cyclin kinase inhibitor 2A                              | 55665308         | 12446                            | 10807                            |
| GAS2         | growth arrest-specific 2                                | 29540559         | 12430                            | 10733                            |
| SUMO3        | SMT3 suppressor of mif two 3 homolog 3                  | 12652587         | 12414                            | 10567                            |
| CITED1       | Cbp/p300-interacting transactivator 1                   | 222136692        | 12380                            | 10345                            |
| CKAP2        | cytoskeleton associated protein 2                       | 148664244        | 12324                            | 9654                             |
| CHEK1        | checkpoint kinase 1                                     | 13278882         | 12305                            | 9312                             |
| BIN3         | bridging integrator 3                                   | 8923904          | 12301                            | 9023                             |
| GSK3B        | glycogen synthase kinase 3B                             | 21361340         | 12268                            | 8912                             |
| HAT1         | histone acetyl transferase 1                            | 38614185         | 12214                            | 8867                             |
| ID3          | inhibitor of DNA binding 3 protein                      | 3219578          | 12206                            | 8564                             |
| SKAP2        | src kinase associated phosphoprotein 2                  | 16753212         | 12185                            | 8342                             |
| CDK5         | cyclin-dependent kinase 5                               | 4826675          | 12160                            | 8121                             |
| HMGN1        | high mobility group nucleosome binding domain 1         | 78070343         | 12076                            | 7323                             |
| CLINT1       | clathrin interactor 1                                   | 307078123        | 12048                            | 7212                             |
| DIABLO       | diablo, IAP-binding mitochondrial protein               | 9845297          | 12123                            | 7022                             |
| NFYB         | nuclear factor YB                                       | 5453780          | 12013                            | 6785                             |
| SNW1         | SNW domain containing 1                                 | 6912676          | 11985                            | 6761                             |
| PRMT2        | protein arginine methyltransferase 2                    | 46255049         | 11948                            | 6749                             |
| RBX1         | E3 ubiquitin-protein ligase                             | 7657508          | 11903                            | 6727                             |
| ATM          | ataxia telangiectasia mutated kinase                    | 1185510          | 11842                            | 6698                             |
| TRIM28       | E3 SUMO protein ligase                                  | 13436401         | 11822                            | 6696                             |
| STUB1        | E3 ubiquitin-protein ligase CHIP                        | 56181387         | 11813                            | 6685                             |
| NFYA         | nuclear factor YA                                       | 56417679         | 11778                            | 6644                             |
| CABLES1      | Cdk5 and Abl enzyme substrate 1                         | 24308408         | 11759                            | 6639                             |
| CDK2         | cyclin dependent kinase 2                               | 16936528         | 11700                            | 6619                             |
| HDAC2        | histone deacetylase 2                                   | 293336691        | 11592                            | 5565                             |
| KAT5         | histone acetyltransferase KAT5 isoform 1                | 36287069         | 12203                            | 5512                             |
| MAPK9        | mitogen-activated protein kinase 9 isoform JNK2 beta 1  | 21237742         | 11498                            | 5490                             |
| HIPK2        | homeodomain interacting protein kinase 2                | 164420685        | 11460                            | 5423                             |
| WT1          | Wilms tumor 1 protein                                   | 896247           | 10969                            | 5398                             |
| SIRT2        | NAD-dependent deacetylase, sirtuin 2                    | 13775600         | 11438                            | 5382                             |
| NFKB1        | nuclear factor NF-kappa-B p105 subunit isoform 1        | 34577122         | 11427                            | 5377                             |
| NR4A1        | nuclear receptor subfamily 4, group A                   | 27894344         | 11387                            | 5371                             |
| HDAC1        | histone deacetylase 1                                   | 13128860         | 11371                            | 5367                             |
| RPS6KB1      | ribosomal protein S6 kinase                             | 31418467         | 11308                            | 5301                             |
| NCOR1        | nuclear corepressor 1                                   | 35193218         | 11251                            | 5239                             |
| EP300        | E1A binding protein, histone acetyltransferase p300     | 50345997         | 11216                            | 5210                             |

|            |                                                        |           |       |      |
|------------|--------------------------------------------------------|-----------|-------|------|
| PRKAA1     | cAMP-activated protein kinase, subunit 1               | 94557301  | 11151 | 5207 |
| CREBBP     | CREB binding protein                                   | 4321116   | 11015 | 5203 |
| ATF3       | activating transcription factor 3                      | 55665721  | 10875 | 5188 |
| TAF1       | TATA box binding protein associated factor 1           | 20357585  | 10856 | 5142 |
| MAPK8      | mitogen-activated protein kinase 8 isoform JNK1 beta 1 | 20986519  | 10837 | 5126 |
| TBP        | TATA-box binding protein                               | 31652304  | 10808 | 5113 |
| DNMT1      | DNA methyltransferase 1                                | 195927037 | 10738 | 5097 |
| HDAC6      | histone deacetylase 6                                  | 13128864  | 10724 | 5092 |
| HSPA4      | heat shock 70 kDa protein 4                            | 38327039  | 10697 | 5072 |
| SMARCA4    | SWI/SNF, matrix associated regulator chromatin, 4      | 223460528 | 10661 | 5068 |
| CREB1      | cAMP responsive element binding protein 1              | 14714956  | 10615 | 5036 |
| HMGAI1     | high mobility group AT-hook 1                          | 39645541  | 10580 | 5025 |
| YES1       | tyrosine-protein kinase Yes                            | 4885661   | 10537 | 5020 |
| TFDP1      | transcription factor DP1                               | 57162469  | 10520 | 5016 |
| YBX1       | Y-box binding protein 1                                | 14714588  | 10509 | 5009 |
| PIM2       | serine/threonine-protein kinase pim-2                  | 42821112  | 10419 | 4997 |
| E2F1       | transcription factor E2F1                              | 12669911  | 10390 | 4990 |
| PNRC2      | proline-rich nuclear receptor coactivator 2            | 55961037  | 10354 | 4986 |
| SP1        | transcription factor Sp1 isoform a                     | 38372901  | 10306 | 4970 |
| TRRAP      | transformation/transcription domain-associated protein | 4507691   | 10294 | 4960 |
| RELA       | Rel-A, transcription factor p65 isoform 1              | 223468676 | 10262 | 4959 |
| MDM2       | E3 ubiquitin protein ligase                            | 155183770 | 10236 | 4945 |
| FBXO11     | F-box only protein 11 isoform 1                        | 30089926  | 10214 | 4922 |
| H2AX       | Histone H2AX                                           | 4504253   | 10196 | 4916 |
| MYCBP      | c-myc binding protein                                  | 57242777  | 10175 | 4915 |
| NEDD8      | ubiquitin-like protein                                 | 47115261  | 10159 | 4905 |
| TOP1       | DNA topoisomerase 1                                    | 11225260  | 10117 | 4900 |
| CK1        | casein kinase 1                                        | 4388767   | 10109 | 4899 |
| MAPK1      | mitogen-activated kinase 1                             | 66932916  | 10061 | 4861 |
| NLK        | serine/threonine-protein kinase NLK                    | 149408126 | 9924  | 4852 |
| YY1        | transcriptional repressor protein YY1                  | 4507955   | 9852  | 4851 |
| RCHY1      | E3 protein ligase                                      | 15930039  | 9850  | 4840 |
| NCOA5      | nuclear receptor coactivator 5                         | 15147335  | 9822  | 4823 |
| SMU1       | smu-1 suppressor of mec-8/unc-52, spliceosome          | 12804047  | 9769  | 4810 |
| ELL        | RNA polymerase II elongation factor ELL                | 5729812   | 9719  | 4805 |
| HMGB1      | high mobility group box 1                              | 55958713  | 9715  | 4735 |
| SIN3B      | transcription regulator                                | 39793970  | 9613  | 4683 |
| SKP1       | S-phase kinase associated protein 1                    | 25777711  | 9536  | 4623 |
| ULK1       | serine/threonine-protein kinase ULK1                   | 4507831   | 9469  | 4587 |
| ACIN1      | apoptotic chromatin condensation inducer 1             | 7662238   | 9375  | 4487 |
| DNMT1      | DNA methyltransferase 1 isoform a                      | 195927037 | 9269  | 4267 |
| DAXX       | DAXX protein                                           | 2253709   | 9243  | 4218 |
| CHRAC1     | chromatin accessibility complex protein 1              | 8393116   | 9208  | 4209 |
| ABL        | tyrosine-protein kinase ABL1 isoform a                 | 62362414  | 9195  | 4178 |
| CDC25C     | cell division cycle 25C homolog                        | 39843081  | 9144  | 4156 |
| PRKDC      | DNA activated protein kinase                           | 13936336  | 9079  | 4121 |
| SIN3A      | SIN3 homolog A, transcription regulator                | 187953437 | 9019  | 4099 |
| PIAS       | protein inhibitor of activated STAT                    | 5533373   | 9008  | 4015 |
| S100B      | S100 calcium binding protein B                         | 12804681  | 8967  | 3999 |
| UVRAG      | UV-radiation resistance associated gene                | 21687212  | 8823  | 3876 |
| SETD7      | histone-lysine N-methyltransferase SETD7 [Homo sapie   | 18139549  | 8814  | 3787 |
| UBA7/UBE2E | ubiquitin-like modifier-activating enzyme 7            | 38045948  | 8777  | 3565 |
| RIPK3      | receptor-interacting serine-threonine kinase 3         | 40254844  | 8723  | 3531 |
| RPTOR      | regulatory-associated protein of mTOR isoform 1        | 22094987  | 8686  | 3497 |
| FOXA3      | F-box protein A3                                       | 160431602 | 8596  | 3487 |
| CDK9       | cyclin-dependent kinase 9                              | 4502747   | 8554  | 3465 |
| CUL1       | Cullin 1                                               | 32307161  | 8514  | 3452 |
| H1         | histone H1                                             | 184072    | 8421  | 3443 |
| HIPK1      | homeodomain interacting protein kinase 1               | 56206715  | 8070  | 3429 |
| HIF1A      | hypoxia inducible factor 1 alpha, isoform 1            | 4504385   | 8010  | 3421 |
| HECTD3     | HECT domain containing 3                               | 157738609 | 7907  | 3403 |
| NR3C1      | nuclear receptor subfamily 2 C1                        | 76057154  | 7713  | 3396 |

|         |                                                       |           |      |      |
|---------|-------------------------------------------------------|-----------|------|------|
| PARP1   | poly ADP ribose polymerase 1                          | 156523968 | 7448 | 3387 |
| CJUN    | Jun oncoprotein                                       | 40226267  | 7206 | 3375 |
| NR4A1   | nuclear receptor subfamily 4, group A                 | 27894344  | 6892 | 3351 |
| ASPP1   | apoptosis-stimulating of p53 protein 1                | 121114287 | 6827 | 3346 |
| TRIM63  | E3 ubiquitin protein ligase                           | 19924163  | 6515 | 3316 |
| YAP1    | Yes-associated protein 1                              | 23398532  | 6481 | 3305 |
| TP53BP2 | TP53 binding protein 2                                | 211830458 | 6307 | 3265 |
| RFX5    | regulatory factor 5                                   | 4557843   | 6267 | 3245 |
| PPP2R4  | protein phosphatase 2A activator, subunit 4           | 220732362 | 6262 | 3234 |
| BRCA1   | breast cancer 1                                       | 1698399   | 6227 | 3215 |
| CDK6    | cyclin-dependent kinase 6                             | 223718134 | 6104 | 3207 |
| PSME3   | proteasome activator complex subunit 3 isoform 1 [Hor | 30410794  | 5874 | 3187 |
| SMG1    | SMG1 kinase                                           | 62243658  | 5509 | 3176 |
| SMC1A   | structural maintenance of chromosome                  | 51327185  | 5483 | 3166 |
| NFAT5   | nuclear factor 5                                      | 124297941 | 5217 | 3154 |
| NUAK1   | SNF1-like kinase 1                                    | 7662170   | 5203 | 3143 |
| CDK1    | cyclin-dependent kinase 1                             | 4502709   | 4998 | 3137 |
| EGFR    | epidermal growth factor receptor                      | 63101670  | 4521 | 3123 |
| NFKBIA  | NF-kappa-B inhibitor alpha                            | 14029101  | 4314 | 3115 |
| BMI1    | BMI1 polycomb ring finger oncogene                    | 55958277  | 3841 | 3109 |
| CAPRIN1 | cell cycle-associated protein-1 isoform 1             | 42558250  | 3528 | 3102 |
| S100A8  | S100 calcium binding protein A8                       | 21614544  | 3443 | 3087 |
| BCOR    | BCL-6 corepressor isoform a                           | 183396783 | 3323 | 3067 |
| UBE2D1  | ubiquitin-conjugating enzyme E2D1, isoform 1          | 4507773   | 2921 | 3013 |
| USP7    | ubiquitin carboxyl-terminal hydrolase 7               | 150378533 | 2878 | 3005 |
| RAB5    | ras-related small GTP binding protein Rab5            | 642532    | 2614 | 2987 |
| GAP43   | growth-associated protein 43                          | 56410855  | 2417 | 2834 |
| UBB     | ubiquitin B                                           | 54887368  | 1689 | 2832 |
| RPS6KA5 | ribosomal protein S6 kinase alpha-5 isoform a         | 32528295  | 1618 | 2765 |
| PRMT5   | protein arginine N-methyltransferase 5 isoform a      | 20070220  | 1561 | 2754 |
| USP47   | ubiquitin carboxyl-terminal hydrolase 47              | 71774197  | 1721 | 2721 |
| S100B   | S100 calcium binding protein B                        | 5454034   | 1426 | 2702 |
| SKI     | SKI oncoprotein                                       | 33348840  | 1361 | 2678 |
| SP100   | SP100 nuclear autoantigen                             | 122939208 | 1330 | 2664 |
| PCNA    | proliferating cell nuclear antigen                    | 387005    | 1329 | 2634 |
| UBE2H   | ubiquitin-conjugating enzyme E2H isoform 1            | 4507783   | 1328 | 2614 |
| PLK1    | polo-like kinase 1                                    | 21359873  | 1327 | 2598 |
| TUBA    | alpha tubulin                                         | 37781283  | 1320 | 2578 |



| Description                                                                                          | Accession | FW    | kDa   | 5:114/11 | 4/113        | 5:115/11 | 5/113        | 116/11 | 6/113 | 15/11        | 117/11 | 7/113        | 118/11 | 8/113 | 17/11 | calc. p | Coverage | #  | PSM     | Pept  | Score A3 | average | APSM    | ptid  | Score A4 | average | PSM | ptides |
|------------------------------------------------------------------------------------------------------|-----------|-------|-------|----------|--------------|----------|--------------|--------|-------|--------------|--------|--------------|--------|-------|-------|---------|----------|----|---------|-------|----------|---------|---------|-------|----------|---------|-----|--------|
| tumor protein p53 [Homo sapiens], TP53                                                               | 23491729  | 51.5  | 1.119 | 8        | <b>2.687</b> | 8        | <b>2.797</b> | 8      | 0.89  | <b>2.633</b> | 8      | <b>2.655</b> | 8      | 0.98  | 7.48  | 12.37   | 8        | 2  | 311.24  | 15.71 | 7        | 3       | 102.81  | 11.27 | 6        | 3       |     |        |
| dual specificity mitogen-activated protein kinase kinase 1 [Homo sapiens], MAP2K1                    | 5579478   | 45.9  | 1.040 | 3        | <b>2.452</b> | 3        | <b>2.420</b> | 3      | 0.84  | <b>2.253</b> | 3      | <b>2.339</b> | 3      | 0.94  | 7.42  | 12.65   | 6        | 2  | 177.59  | 11.65 | 3        | 2       | 127.64  | 12.15 | 3        | 2       |     |        |
| transforming acidic coiled-coil containing protein 1 [Homo sapiens], TACC1                           | 170763517 | 88.8  | 1.046 | 10       | <b>2.346</b> | 11       | <b>2.260</b> | 11     | 0.81  | <b>2.332</b> | 11     | <b>2.266</b> | 11     | 1.12  | 7.97  | 15.35   | 16       | 3  | 228.29  | 11.75 | 6        | 4       | 128.63  | 11.66 | 4        | 3       |     |        |
| RAD51 homolog [Homo sapiens], RAD51                                                                  | 5733658   | 39.8  | 1.059 | 6        | <b>2.293</b> | 6        | <b>2.308</b> | 6      | 0.84  | <b>2.232</b> | 6      | <b>2.267</b> | 6      | 1.18  | 7.92  | 15.50   | 6        | 2  | 268.25  | 15.35 | 9        | 3       | 158.16  | 15.35 | 4        | 2       |     |        |
| mitogen-activated protein kinase kinase 7 [Homo sapiens], MAP7K2                                     | 3108199   | 46.7  | 1.160 | 5        | <b>2.165</b> | 5        | <b>2.145</b> | 5      | 0.89  | <b>2.116</b> | 5      | <b>2.334</b> | 5      | 0.83  | 5.29  | 23.94   | 8        | 2  | 194.50  | 23.94 | 3        | 2       | 88.90   | 23.94 | 5        | 2       |     |        |
| serine/threonine protein kinase 11 [Homo sapiens], STK11                                             | 4507271   | 48.8  | 1.180 | 4        | <b>2.127</b> | 4        | <b>2.136</b> | 4      | 1.20  | <b>2.109</b> | 4      | <b>2.173</b> | 4      | 0.90  | 5.55  | 14.80   | 9        | 4  | 187.64  | 12.50 | 4        | 3       | 108.47  | 14.80 | 5        | 4       |     |        |
| cyclin kinase inhibitor 2D [Homo sapiens], CDKN2D                                                    | 17981702  | 18.7  | 1.067 | 1        | <b>2.028</b> | 1        | <b>2.108</b> | 1      | 0.95  | <b>2.059</b> | 1      | <b>2.084</b> | 1      | 1.05  | 5.88  | 20.63   | 2        | 1  | 558.50  | 15.13 | 1        | 1       | 301.19  | 16.31 | 1        | 1       |     |        |
| serine/threonine protein kinase ATR [Homo sapiens], ATR                                              | 157266317 | 290.1 | 1.018 | 18       | <b>1.968</b> | 18       | <b>1.978</b> | 18     | 0.88  | <b>1.985</b> | 18     | <b>1.936</b> | 18     | 1.08  | 5.76  | 1.86    | 16       | 10 | 62.89   | 1.86  | 1        | 1       | 46.48   | 1.86  | 12       | 8       |     |        |
| apoptosis-stimulating of p53 protein 1 [Homo sapiens], ASPP1                                         | 121114287 | 109.8 | 1.089 | 13       | <b>1.925</b> | 3        | <b>1.939</b> | 13     | 1.12  | <b>1.918</b> | 13     | <b>1.971</b> | 13     | 0.95  | 4.81  | 6.56    | 8        | 5  | 84.39   | 6.56  | 2        | 1       | 126.03  | 6.56  | 6        | 3       |     |        |
| diablo homolog, mitochondrial isoform a [Homo sapiens], SMAC/DIABLO                                  | 9845297   | 29.6  | 1.161 | 1        | <b>1.910</b> | 1        | <b>1.903</b> | 1      | 0.98  | <b>1.936</b> | 1      | <b>1.950</b> | 1      | 0.92  | 6.33  | 3.49    | 3        | 2  | 67.48   | 3.49  | 2        | 2       | 29.91   | 1.96  | 1        | 1       |     |        |
| NF-kappa B essential modulator isoform a [Homo sapiens], NEMO                                        | 4504631   | 47.5  | 1.093 | 1        | <b>1.907</b> | 1        | <b>1.911</b> | 1      | 1.15  | <b>1.901</b> | 1      | <b>1.947</b> | 1      | 0.85  | 10.36 | 10.14   | 1        | 1  | 19.34   | 5.79  | 1        | 1       | 46.01   | 10.14 | 1        | 1       |     |        |
| mitogen-activated protein kinase kinase kinase 4 isoform a [Homo sapiens], MEKK4                     | 55956904  | 178.9 | 1.160 | 11       | <b>1.895</b> | 1        | <b>1.803</b> | 11     | 0.97  | <b>1.826</b> | 11     | <b>1.864</b> | 11     | 0.92  | 6.33  | 4.19    | 8        | 5  | 67.48   | 4.11  | 2        | 2       | 29.91   | 1.96  | 6        | 3       |     |        |
| histone acetyltransferase KAT5 isoform 1 [Homo sapiens], KAT5                                        | 36287069  | 59.6  | 1.078 | 9        | <b>1.891</b> | 10       | <b>1.648</b> | 10     | 1.00  | <b>1.708</b> | 9      | <b>1.606</b> | 10     | 0.95  | 6.64  | 38.03   | 9        | 4  | 1926.45 | 38.03 | 34       | 9       | 949.07  | 20.74 | 10       | 4       |     |        |
| apoptosis-stimulating of p53 protein 2 [Homo sapiens], ASPP2                                         | 112799849 | 121.5 | 1.166 | 10       | <b>1.869</b> | 1        | <b>1.801</b> | 10     | 0.98  | <b>1.822</b> | 10     | <b>1.830</b> | 10     | 0.94  | 6.39  | 5.12    | 7        | 2  | 74.48   | 3.89  | 2        | 1       | 47.84   | 3.15  | 5        | 2       |     |        |
| growth arrest and DNA damage-inducible protein 45 beta [Homo sapiens], GADD45B                       | 86991436  | 21.5  | 1.062 | 4        | <b>1.866</b> | 4        | <b>1.809</b> | 4      | 0.83  | <b>1.806</b> | 4      | <b>1.817</b> | 4      | 0.80  | 9.20  | 9.90    | 6        | 2  | 57.15   | 9.90  | 2        | 2       | 65.47   | 9.90  | 4        | 2       |     |        |
| transcription factor E2F1 [Homo sapiens], E2F1                                                       | 12669911  | 56.4  | 1.019 | 9        | <b>1.846</b> | 9        | <b>1.801</b> | 9      | 1.08  | <b>1.801</b> | 9      | <b>1.807</b> | 9      | 1.16  | 5.33  | 28.05   | 10       | 4  | 486.50  | 28.05 | 9        | 4       | 236.61  | 28.05 | 9        | 4       |     |        |
| high mobility protein B1 [Homo sapiens], HMGB1                                                       | 248145843 | 26.1  | 1.093 | 1        | <b>1.824</b> | 1        | <b>1.796</b> | 1      | 1.15  | <b>1.794</b> | 1      | <b>1.809</b> | 1      | 1.12  | 5.10  | 11.40   | 1        | 1  | 642.27  | 10.31 | 14       | 5       | 207.14  | 11.40 | 1        | 1       |     |        |
| DNA damage-inducible transcript 4 [Homo sapiens], DDIT4                                              | 9506687   | 25.5  | 1.063 | 1        | <b>1.803</b> | 1        | <b>1.782</b> | 1      | 0.94  | <b>1.714</b> | 1      | <b>1.783</b> | 1      | 0.90  | 9.85  | 7.75    | 1        | 1  | 32.53   | 14.45 | 1        | 1       | 44.48   | 7.75  | 1        | 1       |     |        |
| histone acetyltransferase KAT2B [Homo sapiens], KAT2B                                                | 40805843  | 91.4  | 1.085 | 4        | <b>1.789</b> | 4        | <b>1.734</b> | 4      | 0.97  | <b>1.711</b> | 4      | <b>1.909</b> | 4      | 1.10  | 4.98  | 11.16   | 4        | 4  | 542.97  | 9.13  | 15       | 6       | 436.87  | 11.16 | 20       | 8       |     |        |
| Axin [Homo sapiens], AXIN                                                                            | 14336691  | 99.4  | 1.028 | 10       | <b>1.741</b> | 10       | <b>1.749</b> | 10     | 0.91  | <b>1.648</b> | 10     | <b>1.742</b> | 10     | 1.00  | 6.62  | 22.65   | 10       | 9  | 504.31  | 18.58 | 11       | 7       | 69.60   | 14.50 | 5        | 5       |     |        |
| stratifin [Homo sapiens], SFN                                                                        | 49456807  | 28.3  | 1.029 | 7        | <b>1.737</b> | 7        | <b>1.735</b> | 7      | 0.86  | <b>1.615</b> | 7      | <b>1.609</b> | 7      | 1.03  | 7.52  | 12.98   | 7        | 3  | 165.66  | 12.98 | 5        | 3       | 114.98  | 12.98 | 7        | 3       |     |        |
| activating enhancer binding protein 2 alpha isoform a [Homo sapiens], TFAP2A                         | 4507441   | 48.5  | 1.185 | 6        | <b>1.736</b> | 6        | <b>1.760</b> | 6      | 0.81  | <b>1.533</b> | 11     | <b>1.666</b> | 6      | 1.12  | 7.97  | 15.35   | 6        | 3  | 158.16  | 15.35 | 6        | 3       | 158.16  | 15.35 | 4        | 3       |     |        |
| myc box-dependent-interacting protein/bridging interactor 1 [Homo sapiens], BIN1                     | 21536400  | 65.9  | 1.089 | 3        | <b>1.718</b> | 3        | <b>1.704</b> | 3      | 0.83  | <b>1.618</b> | 3      | <b>1.580</b> | 3      | 1.02  | 7.01  | 49.03   | 9        | 8  | 3911.15 | 38.41 | 15       | 13      | 1804.71 | 40.34 | 8        | 5       |     |        |
| regulatory-associated protein of mTOR isoform 1 [Homo sapiens], RPTOR                                | 22094987  | 125.8 | 1.044 | 4        | <b>1.702</b> | 4        | <b>1.646</b> | 4      | 0.85  | <b>1.644</b> | 4      | <b>1.604</b> | 4      | 1.15  | 8.54  | 13.43   | 8        | 5  | 367.22  | 11.51 | 11       | 4       | 116.66  | 8.87  | 7        | 4       |     |        |
| TP53 inducible nuclear protein 1 [Homo sapiens], TP53INP1                                            | 15150807  | 26.5  | 1.135 | 4        | <b>1.696</b> | 4        | <b>1.648</b> | 4      | 0.81  | <b>1.636</b> | 4      | <b>1.642</b> | 4      | 1.15  | 8.35  | 13.43   | 6        | 5  | 367.22  | 11.51 | 11       | 4       | 116.66  | 8.87  | 7        | 4       |     |        |
| 5'-AMP-activated protein kinase catalytic subunit alpha-1 isoform [Homo sapiens], AMPK               | 94557301  | 62.3  | 1.098 | 4        | <b>1.691</b> | 34       | <b>1.515</b> | 4      | 0.87  | <b>1.660</b> | 4      | <b>1.589</b> | 4      | 1.18  | 4.88  | 9.68    | 4        | 1  | 1078.04 | 8.51  | 28       | 14      | 524.18  | 5.79  | 4        | 1       |     |        |
| programmed cell death 4 isoform 2 [Homo sapiens], PDCD4                                              | 57162254  | 51.5  | 1.119 | 8        | <b>1.661</b> | 8        | <b>1.647</b> | 8      | 0.82  | <b>1.633</b> | 8      | <b>1.655</b> | 8      | 0.98  | 5.48  | 10.70   | 10       | 3  | 358.24  | 10.70 | 7        | 3       | 120.81  | 10.70 | 6        | 3       |     |        |
| MSH homeobox protein 1 [Homo sapiens], MSX1                                                          | 45595674  | 32.9  | 1.040 | 3        | <b>1.652</b> | 3        | <b>1.624</b> | 3      | 0.84  | <b>1.626</b> | 3      | <b>1.634</b> | 3      | 0.94  | 7.42  | 10.65   | 6        | 2  | 177.59  | 10.65 | 3        | 2       | 122.64  | 10.65 | 3        | 2       |     |        |
| sestrin 2 [Homo sapiens], SESN2                                                                      | 119628108 | 55.8  | 1.046 | 10       | <b>1.646</b> | 11       | <b>1.626</b> | 11     | 0.81  | <b>1.633</b> | 11     | <b>1.666</b> | 11     | 1.12  | 7.97  | 15.35   | 16       | 3  | 228.29  | 11.75 | 6        | 4       | 128.63  | 11.66 | 4        | 3       |     |        |
| homeodomain interacting protein kinase 2 [Homo sapiens], HIPK2                                       | 164420685 | 122.8 | 1.059 | 16       | <b>1.643</b> | 16       | <b>1.603</b> | 16     | 0.84  | <b>1.623</b> | 16     | <b>1.627</b> | 16     | 1.18  | 7.92  | 15.50   | 16       | 12 | 268.25  | 15.35 | 9        | 3       | 158.16  | 15.35 | 7        | 3       |     |        |
| programmed cell death protein 6 [Homo sapiens], PDCD6                                                | 7019485   | 21.7  | 1.160 | 5        | <b>1.602</b> | 5        | <b>1.601</b> | 5      | 0.89  | <b>1.512</b> | 5      | <b>1.603</b> | 5      | 0.83  | 5.29  | 23.94   | 8        | 2  | 194.50  | 23.94 | 3        | 2       | 88.90   | 23.94 | 5        | 2       |     |        |
| cyclin kinase inhibitor 1B [Homo sapiens], CDKN1B                                                    | 48146915  | 21.8  | 1.180 | 4        | <b>1.541</b> | 4        | <b>1.536</b> | 4      | 1.20  | <b>1.509</b> | 4      | <b>1.673</b> | 4      | 0.90  | 5.55  | 14.80   | 9        | 4  | 187.64  | 12.50 | 4        | 3       | 108.47  | 14.80 | 5        | 4       |     |        |
| serine/threonine-protein kinase Chk1 [Homo sapiens], CHK1                                            | 166295196 | 52.7  | 1.067 | 18       | <b>1.530</b> | 18       | <b>1.616</b> | 18     | 0.95  | <b>1.659</b> | 18     | <b>1.584</b> | 18     | 1.05  | 5.88  | 20.63   | 22       | 9  | 558.50  | 15.13 | 15       | 6       | 301.19  | 16.31 | 17       | 8       |     |        |
| caspace recruitment domain containing pro-apoptotic protein [Homo sapiens], CARP                     | 13376431  | 47.1  | 1.018 | 1        | <b>1.497</b> | 1        | <b>1.578</b> | 1      | 0.88  | <b>1.485</b> | 1      | <b>1.936</b> | 1      | 1.08  | 5.76  | 1.86    | 2        | 1  | 62.89   | 1.86  | 1        | 1       | 46.48   | 1.86  | 1        | 1       |     |        |
| activating transcription factor 3 [Homo sapiens], ATF3                                               | 55665721  | 19.8  | 1.089 | 3        | <b>1.492</b> | 3        | <b>1.439</b> | 3      | 1.12  | <b>1.418</b> | 3      | <b>1.571</b> | 3      | 0.95  | 4.81  | 6.56    | 5        | 1  | 84.39   | 6.56  | 2        | 1       | 126.03  | 6.56  | 3        | 1       |     |        |
| proliferating cell nuclear antigen [Homo sapiens], PCNA                                              | 49456555  | 29.6  | 1.161 | 1        | <b>1.480</b> | 1        | <b>1.403</b> | 1      | 0.98  | <b>1.355</b> | 1      | <b>1.500</b> | 1      | 0.92  | 6.33  | 3.49    | 3        | 2  | 67.48   | 3.49  | 2        | 2       | 29.91   | 1.96  | 1        | 1       |     |        |
| CREB binding protein [Homo sapiens], CREBBP                                                          | 194358893 | 7.5   | 1.093 | 1        | <b>1.473</b> | 1        | <b>1.411</b> | 1      | 1.15  | <b>1.401</b> | 1      | <b>1.471</b> | 1      | 0.85  | 10.36 | 10.14   | 1        | 1  | 19.34   | 5.79  | 1        | 1       | 46.01   | 10.14 | 1        | 1       |     |        |
| histone H2AX gamma [Homo sapiens], H2AFX                                                             | 4504253   | 15.9  | 1.160 | 1        | <b>1.470</b> | 1        | <b>1.403</b> | 1      | 0.97  | <b>1.426</b> | 1      | <b>1.464</b> | 1      | 0.92  | 6.33  | 4.19    | 3        | 2  | 67.48   | 4.11  | 2        | 2       | 29.91   | 1.96  | 1        | 1       |     |        |
| growth arrest and DNA-damage-inducible, gamma [Homo sapiens], GADD45G                                | 55663260  | 17.5  | 1.166 | 1        | <b>1.469</b> | 1        | <b>1.503</b> | 1      | 0.98  | <b>1.422</b> | 1      | <b>1.430</b> | 1      | 0.94  | 6.39  | 5.12    | 3        | 2  | 74.48   | 3.89  | 2        | 1       | 47.84   | 3.15  | 1        | 1       |     |        |
| ataxia telangiectasia mutated kinase [Homo sapiens], ATM                                             | 2304971   | 321.5 | 1.062 | 4        | <b>1.466</b> | 4        | <b>1.341</b> | 4      | 0.83  | <b>1.406</b> | 4      | <b>1.417</b> | 4      | 0.80  | 9.20  | 9.90    | 6        | 2  | 57.15   | 9.90  | 2        | 2       | 65.47   | 9.90  | 4        | 2       |     |        |
| excision repair cross-complementing repair deficiency, complementation group 1 [Homo sapiens], ERCC1 | 42544169  | 36.4  | 1.019 | 9        | <b>1.465</b> | 9        | <b>1.360</b> | 9      | 1.08  | <b>1.401</b> | 9      | <b>1.407</b> | 9      | 1.16  | 5.33  | 28.05   | 10       | 4  | 486.50  | 28.05 | 9        | 4       | 236.61  | 28.05 | 9        | 4       |     |        |
| E3 ubiquitin-protein ligase Mdm2 [Homo sapiens], MDM2                                                | 89993689  | 54.9  | 0.994 | 2        | <b>1.461</b> | 2        | <b>1.419</b> | 2      | 1.10  | <b>1.508</b> | 2      | <b>1.544</b> |        |       |       |         |          |    |         |       |          |         |         |       |          |         |     |        |

|                                                                                                |           |       |       |    |              |    |              |    |      |              |    |              |    |      |      |       |    |    |         |       |    |    |         |       |    |    |
|------------------------------------------------------------------------------------------------|-----------|-------|-------|----|--------------|----|--------------|----|------|--------------|----|--------------|----|------|------|-------|----|----|---------|-------|----|----|---------|-------|----|----|
| apoptosis regulator Bcl-2 alpha isoform [Homo sapiens], BCL2                                   | 72198189  | 27.1  | 1.065 | 2  | <b>1.257</b> | 2  | <b>1.239</b> | 2  | 1.05 | <b>1.269</b> | 2  | <b>1.319</b> | 2  | 1.19 | 6.62 | 1.76  | 3  | 1  | 58.88   | 1.76  | 1  | 1  | 47.17   | 1.76  | 2  | 1  |
| Y-box binding protein 1 [Homo sapiens], YBX1                                                   | 116283293 | 20.6  | 1.099 | 2  | <b>1.251</b> | 2  | <b>1.224</b> | 2  | 0.81 | <b>1.235</b> | 2  | <b>1.299</b> | 2  | 0.99 | 5.96 | 1.73  | 3  | 1  | 38.38   | 1.73  | 1  | 1  | 102.35  | 1.73  | 2  | 1  |
| mitochondrial inner membrane protein [Homo sapiens], IMMT                                      | 48145703  | 81.1  | 1.082 | 3  | <b>1.249</b> | 3  | <b>1.216</b> | 3  | 0.89 | <b>1.373</b> | 3  | <b>1.388</b> | 3  | 0.99 | 6.07 | 4.32  | 5  | 3  | 135.83  | 4.32  | 3  | 3  | 62.10   | 3.19  | 2  | 2  |
| poly ADP ribose polymerase 1 [Homo sapiens], PARP1                                             | 116283598 | 26.1  | 1.194 | 8  | <b>1.247</b> | 8  | <b>1.214</b> | 8  | 1.05 | <b>1.394</b> | 8  | <b>1.217</b> | 8  | 1.15 | 7.97 | 39.53 | 7  | 4  | 241.32  | 22.09 | 6  | 2  | 78.26   | 39.53 | 7  | 4  |
| beclin 1 [Homo sapiens], BECN1                                                                 | 4502395   | 52.5  | 1.186 | 1  | <b>1.236</b> | 1  | <b>1.268</b> | 1  | 0.97 | <b>1.272</b> | 1  | <b>1.271</b> | 1  | 1.14 | 9.54 | 12.70 | 2  | 1  | 48.09   | 12.70 | 1  | 1  | 31.47   | 12.70 | 1  | 1  |
| mediator of DNA-damage checkpoint 1 [Homo sapiens], MDC1                                       | 168985671 | 33.1  | 1.005 | 7  | <b>1.235</b> | 7  | <b>1.213</b> | 7  | 0.98 | <b>1.435</b> | 7  | <b>1.263</b> | 7  | 1.14 | 6.57 | 42.13 | 7  | 3  | 478.51  | 37.50 | 15 | 6  | 331.52  | 18.98 | 7  | 4  |
| p53 and DNA damage regulated 1 [Homo sapiens], PDRG1                                           | 38197489  | 13.7  | 1.086 | 8  | <b>1.223</b> | 8  | <b>1.213</b> | 8  | 1.15 | <b>1.245</b> | 8  | <b>1.276</b> | 8  | 0.85 | 9.31 | 5.23  | 10 | 4  | 177.53  | 5.23  | 6  | 4  | 77.94   | 2.48  | 4  | 2  |
| Mdm4, p53 binding protein homolog [Homo sapiens], MDM4                                         | 55960021  | 21.8  | 1.044 | 6  | <b>1.222</b> | 7  | <b>1.212</b> | 7  | 0.89 | <b>1.235</b> | 37 | <b>1.552</b> | 7  | 0.92 | 7.09 | 34.79 | 6  | 2  | 2006.73 | 34.79 | 37 | 12 | 578.75  | 20.77 | 5  | 1  |
| ataxin-10 isoform 1 [Homo sapiens], ATXN10                                                     | 169145012 | 21.5  | 1.092 | 25 | <b>1.216</b> | 25 | <b>1.212</b> | 25 | 0.85 | <b>1.230</b> | 25 | <b>1.147</b> | 25 | 1.13 | 5.25 | 9.89  | 29 | 5  | 622.75  | 9.89  | 18 | 5  | 414.31  | 8.63  | 21 | 4  |
| CDK5 and ABL1 enzyme substrate 1 isoform 1 [Homo sapiens], CABLES1                             | 24308408  | 40.6  | 1.097 | 1  | <b>1.215</b> | 1  | <b>1.269</b> | 1  | 1.15 | <b>1.293</b> | 1  | <b>1.274</b> | 1  | 1.11 | 6.13 | 3.15  | 2  | 1  | 66.61   | 3.15  | 1  | 1  | 47.84   | 3.15  | 1  | 1  |
| DNA damage-binding protein 2 [Homo sapiens], DDB2                                              | 4557515   | 46.1  | 1.093 | 27 | <b>1.211</b> | 31 | <b>1.248</b> | 31 | 0.81 | <b>1.253</b> | 31 | <b>1.209</b> | 31 | 0.82 | 7.03 | 51.92 | 30 | 20 | 5402.07 | 51.92 | 78 | 20 | 1829.81 | 49.13 | 22 | 18 |
| UV excision repair protein RAD23 homolog B [Homo sapiens], RAD23                               | 4506387   | 43.1  | 1.097 | 17 | <b>1.209</b> | 17 | <b>1.210</b> | 17 | 0.80 | <b>1.226</b> | 17 | <b>1.333</b> | 17 | 0.92 | 4.84 | 20.54 | 17 | 8  | 408.33  | 16.38 | 11 | 6  | 294.04  | 16.63 | 16 | 6  |
| ATP-binding cassette, sub-family B (MDR/TAP), member 1 [Homo sapiens], ABCB1                   | 119597349 | 31.6  | 1.150 | 6  | <b>1.207</b> | 6  | <b>1.209</b> | 6  | 0.86 | <b>1.272</b> | 6  | <b>1.070</b> | 6  | 1.19 | 5.19 | 17.05 | 8  | 5  | 200.39  | 17.05 | 5  | 5  | 104.75  | 6.53  | 3  | 2  |
| nuclear mitotic apparatus protein 1 [Homo sapiens], NUMA1                                      | 31455194  | 170.6 | 1.087 | 1  | <b>1.205</b> | 1  | <b>1.208</b> | 1  | 0.97 | <b>1.393</b> | 1  | <b>1.351</b> | 1  | 1.03 | 7.17 | 5.76  | 2  | 2  | 68.19   | 5.76  | 2  | 2  | 39.89   | 8.76  | 2  | 2  |
| Ras association (RalGDS/AF-6) and pleckstrin homology domains 1 [Homo sapiens], RAPHA1         | 47132519  | 132.2 | 1.097 | 8  | <b>1.204</b> | 8  | <b>1.207</b> | 8  | 0.81 | <b>1.386</b> | 8  | <b>1.293</b> | 8  | 1.07 | 7.24 | 7.50  | 8  | 3  | 394.05  | 5.42  | 8  | 2  | 271.10  | 7.50  | 10 | 3  |
| peroxisome proliferator-activated receptor gamma, coactivator 1 alpha [Homo sapiens], PPARGC1A | 160431604 | 86.9  | 1.031 | 8  | <b>1.203</b> | 8  | <b>1.205</b> | 8  | 0.92 | <b>1.219</b> | 8  | <b>1.153</b> | 8  | 1.06 | 7.44 | 17.07 | 6  | 5  | 373.55  | 17.07 | 8  | 5  | 181.89  | 13.28 | 8  | 4  |
| growth-arrest specific 7, isoform b [Homo sapiens], GAS7                                       | 41460678  | 44.3  | 1.110 | 11 | <b>1.202</b> | 11 | <b>1.205</b> | 11 | 1.01 | <b>1.586</b> | 11 | <b>1.380</b> | 11 | 1.15 | 5.03 | 20.00 | 9  | 4  | 403.25  | 20.00 | 14 | 4  | 299.21  | 19.09 | 10 | 3  |
| ATP-binding cassette sub-family B member 7, mitochondrial [Homo sapiens], ABCB7                | 57209191  | 82.7  | 1.052 | 7  | <b>1.201</b> | 7  | <b>1.204</b> | 7  | 1.14 | <b>1.250</b> | 7  | <b>1.107</b> | 7  | 0.98 | 9.33 | 12.48 | 7  | 6  | 295.35  | 11.42 | 7  | 5  | 225.82  | 12.48 | 8  | 6  |
| serine/threonine-protein kinase [Homo sapiens], DCLK1                                          | 4758128   | 81.0  | 0.975 | 6  | <b>0.799</b> | 6  | <b>0.805</b> | 6  | 0.90 | <b>0.805</b> | 6  | <b>0.752</b> | 6  | 1.00 | 8.66 | 3.02  | 6  | 2  | 221.79  | 1.51  | 5  | 1  | 171.19  | 3.02  | 7  | 2  |
| hypoxia-inducible factor 1-alpha isoform 1 [Homo sapiens], HIF1A                               | 4504385   | 90.9  | 0.984 | 1  | <b>0.797</b> | 1  | <b>0.708</b> | 1  | 0.90 | <b>0.709</b> | 1  | <b>0.936</b> | 1  | 1.08 | 5.76 | 1.86  | 2  | 1  | 62.89   | 1.86  | 1  | 1  | 46.48   | 1.86  | 1  | 1  |
| C-terminal-binding protein 1 isoform 1 [Homo sapiens], CTBP1                                   | 4557497   | 48.5  | 1.205 | 2  | <b>0.781</b> | 2  | <b>0.678</b> | 2  | 1.15 | <b>0.514</b> | 2  | <b>0.611</b> | 2  | 0.84 | 5.41 | 8.82  | 4  | 2  | 147.51  | 8.82  | 2  | 2  | 118.70  | 8.82  | 2  | 2  |
| Clock [Homo sapiens], CLOCK                                                                    | 2275619   | 92.3  | 0.916 | 29 | <b>0.781</b> | 29 | <b>0.725</b> | 29 | 0.80 | <b>0.713</b> | 29 | <b>0.734</b> | 29 | 0.91 | 4.93 | 47.31 | 28 | 5  | 535.89  | 47.31 | 15 | 5  | 315.77  | 47.31 | 23 | 5  |
| X-linked inhibitor of apoptosis [Homo sapiens], XIAP                                           | 8744934   | 59.8  | 0.953 | 6  | <b>0.772</b> | 6  | <b>0.780</b> | 6  | 0.90 | <b>0.746</b> | 6  | <b>0.745</b> | 6  | 1.00 | 8.66 | 3.02  | 6  | 2  | 221.79  | 1.51  | 5  | 1  | 171.19  | 3.02  | 7  | 2  |
| ribosomal protein L11 isoform 1 [Homo sapiens], RPL11                                          | 15431290  | 29.5  | 0.981 | 17 | <b>0.766</b> | 17 | <b>0.715</b> | 17 | 1.07 | <b>0.432</b> | 17 | <b>0.676</b> | 17 | 0.91 | 8.62 | 21.19 | 18 | 12 | 817.17  | 18.22 | 19 | 10 | 552.85  | 18.37 | 19 | 10 |
| RAC-alpha serine/threonine-protein kinase [Homo sapiens], AKT1                                 | 62241015  | 52.3  | 0.995 | 4  | <b>0.762</b> | 4  | <b>0.691</b> | 4  | 0.92 | <b>0.707</b> | 4  | <b>0.685</b> | 4  | 1.12 | 5.31 | 25.13 | 5  | 5  | 123.50  | 13.09 | 2  | 2  | 51.41   | 12.04 | 3  | 3  |
| CDK5 regulatory subunit-associated protein 1 [Homo sapiens], CDK5RAP1                          | 56205141  | 65.1  | 0.921 | 1  | <b>0.747</b> | 1  | <b>0.794</b> | 1  | 0.88 | <b>0.723</b> | 1  | <b>0.811</b> | 1  | 0.90 | 7.46 | 1.73  | 2  | 1  | 40.04   | 1.73  | 1  | 1  | 47.19   | 1.73  | 1  | 1  |
| Retinoblastoma binding protein 8 [Homo sapiens], RBBP8                                         | 42718015  | 97.9  | 0.915 | 26 | <b>0.742</b> | 26 | <b>0.759</b> | 26 | 1.13 | <b>0.727</b> | 26 | <b>0.733</b> | 26 | 0.99 | 5.31 | 19.34 | 48 | 11 | 707.90  | 17.89 | 21 | 10 | 579.00  | 16.05 | 27 | 9  |
| DNA topoisomerase 2-alpha [Homo sapiens], TOP2A                                                | 19913406  | 174.3 | 0.934 | 2  | <b>0.741</b> | 2  | <b>0.755</b> | 2  | 0.98 | <b>0.743</b> | 2  | <b>0.718</b> | 2  | 1.03 | 8.72 | 3.33  | 7  | 4  | 143.21  | 3.33  | 4  | 4  | 47.44   | 2.61  | 3  | 3  |
| cyclin-dependent kinase 2 associated protein 3 [Homo sapiens], CDK2AP1                         | 4758188   | 12.8  | 0.910 | 4  | <b>0.735</b> | 4  | <b>0.676</b> | 4  | 1.09 | <b>0.772</b> | 4  | <b>0.852</b> | 4  | 0.91 | 7.46 | 4.33  | 6  | 2  | 76.71   | 4.33  | 3  | 2  | 77.91   | 2.09  | 3  | 1  |
| X-ray repair complementing defective repair 3 [Homo sapiens], XRCC1                            | 48145573  | 71.2  | 0.909 | 16 | <b>0.734</b> | 15 | <b>0.680</b> | 15 | 1.08 | <b>0.715</b> | 16 | <b>0.718</b> | 16 | 0.99 | 5.66 | 17.84 | 18 | 11 | 742.53  | 14.71 | 10 | 8  | 308.80  | 15.10 | 28 | 13 |
| relA-associated inhibitor [Homo sapiens], IASPP                                                | 63003907  | 90.9  | 0.929 | 21 | <b>0.732</b> | 25 | <b>0.672</b> | 25 | 1.08 | <b>0.749</b> | 26 | <b>0.776</b> | 26 | 0.98 | 5.58 | 19.67 | 28 | 14 | 1042.57 | 19.79 | 20 | 10 | 618.58  | 25.10 | 25 | 15 |
| serine/threonine-protein kinase PLK2 [Homo sapiens], PLK2                                      | 93004081  | 76.5  | 0.919 | 18 | <b>0.731</b> | 17 | <b>0.678</b> | 17 | 1.08 | <b>0.714</b> | 17 | <b>0.708</b> | 17 | 0.95 | 5.17 | 18.14 | 21 | 12 | 912.66  | 15.11 | 17 | 9  | 413.03  | 11.30 | 29 | 11 |
| BCL2-associated athanogene [Homo sapiens], BAG                                                 | 45331268  | 18.5  | 0.915 | 1  | <b>0.721</b> | 1  | <b>0.681</b> | 1  | 0.85 | <b>0.605</b> | 1  | <b>0.736</b> | 1  | 1.13 | 8.98 | 0.49  | 1  | 1  | 43.33   | 12.49 | 1  | 1  | 26.16   | 11.99 | 6  | 4  |
| XIAP-associated factor 1 isoform 1 [Homo sapiens], NUTLIN2                                     | 40288191  | 33.2  | 0.907 | 1  | <b>0.720</b> | 1  | <b>0.689</b> | 1  | 1.08 | <b>0.717</b> | 1  | <b>0.782</b> | 1  | 1.15 | 5.74 | 4.43  | 1  | 1  | 9.98    | 9.09  | 1  | 1  | 43.40   | 4.43  | 1  | 1  |
| nuclear factor NF-kappa-B p105 subunit isoform 1 [Homo sapiens], NFKB1                         | 34577122  | 111.0 | 0.909 | 4  | <b>0.718</b> | 4  | <b>0.727</b> | 4  | 0.97 | <b>0.711</b> | 4  | <b>0.793</b> | 4  | 1.10 | 4.98 | 11.16 | 5  | 8  | 542.97  | 9.13  | 15 | 6  | 436.87  | 11.16 | 6  | 8  |
| nucleus accumbens-associated protein 1 [Homo sapiens], NAC1                                    | 16418383  | 57.6  | 0.905 | 18 | <b>0.717</b> | 57 | <b>0.680</b> | 17 | 1.18 | <b>0.763</b> | 17 | <b>0.715</b> | 17 | 0.83 | 8.84 | 32.74 | 14 | 16 | 2217.01 | 29.89 | 48 | 14 | 1122.87 | 26.77 | 16 | 13 |
| double-strand-break repair protein rad21 homolog [Homo sapiens], RAD21                         | 5453994   | 71.6  | 0.911 | 1  | <b>0.710</b> | 1  | <b>0.730</b> | 1  | 1.09 | <b>0.708</b> | 1  | <b>0.722</b> | 1  | 0.98 | 4.65 | 1.43  | 2  | 1  | 44.73   | 1.43  | 1  | 1  | 40.25   | 1.43  | 1  | 1  |
| serine-threonine kinase ULK1 [Homo sapiens], ULK1                                              | 4507831   | 110.2 | 0.885 | 41 | <b>0.706</b> | 43 | <b>0.876</b> | 43 | 1.18 | <b>0.702</b> | 43 | <b>0.621</b> | 43 | 0.88 | 5.03 | 41.24 | 41 | 12 | 2046.84 | 39.86 | 42 | 11 | 1440.49 | 41.24 | 39 | 12 |
| cytochrome b5 type B [Homo sapiens], CYB5B                                                     | 37514836  | 17.3  | 0.927 | 6  | <b>0.705</b> | 6  | <b>0.663</b> | 6  | 1.13 | <b>0.770</b> | 6  | <b>0.844</b> | 6  | 0.91 | 5.14 | 54.08 | 6  | 4  | 294.22  | 54.08 | 5  | 4  | 155.05  | 54.08 | 6  | 4  |
| mitochondrial import receptor subunit TOM70 [Homo sapiens], TOM70                              | 54607135  | 67.4  | 0.931 | 8  | <b>0.689</b> | 8  | <b>0.897</b> | 8  | 1.09 | <b>0.765</b> | 8  | <b>0.886</b> | 8  | 0.86 | 7.12 | 7.07  | 13 | 4  | 302.41  | 7.07  | 7  | 4  | 167.16  | 5.92  | 6  | 3  |
| TP53 regulated inhibitor of apoptosis 1 [Homo sapiens], TRIAP1                                 | 7705467   | 8.0   | 0.929 | 3  | <b>0.687</b> | 3  | <b>0.650</b> | 3  | 0.86 | <b>0.643</b> | 3  | <b>0.640</b> | 3  | 1.02 | 6.80 | 9.15  | 5  | 3  | 123.30  | 9.15  | 3  | 3  | 71.99   | 6.18  | 2  | 2  |
| aurora kinase A [Homo sapiens], AURKA                                                          | 126541215 | 16.8  | 0.901 | 44 | <b>0.683</b> | 44 | <b>0.726</b> | 44 | 0.92 | <b>0.705</b> | 44 | <b>0.719</b> | 44 | 0.94 | 8.40 | 19.37 | 49 | 11 | 901.04  | 14.96 | 25 | 8  | 669.75  | 19.37 | 44 | 11 |
| heat shock protein 60 kDa protein 1, mitochondrial [Homo sapiens], HSPD1                       | 189502784 | 62.1  | 0.905 | 58 | <b>0.681</b> |    |              |    |      |              |    |              |    |      |      |       |    |    |         |       |    |    |         |       |    |    |

| Description                                                                                                   | Accession  | MW [kDa] | AS: 114/113 | 114/113 | AS: 115/111  | 115/111 | AS: 116/111  | 116/113 | 115/116 | AS: 117/111  | 117/113 | AS: 118/113  | 118/113 | 117/114 | calc. pI | Coverage # | PSM # | Peptide # | Score A3 | Coverage A1 | PSM # | Peptides | Score A4 | Coverage A1 | PSM # | Peptides |  |
|---------------------------------------------------------------------------------------------------------------|------------|----------|-------------|---------|--------------|---------|--------------|---------|---------|--------------|---------|--------------|---------|---------|----------|------------|-------|-----------|----------|-------------|-------|----------|----------|-------------|-------|----------|--|
| Table SVI. DeltaNp63alpha-interacting proteins in sensitive SCC (wild type p63) cells upon cisplatin exposure |            |          |             |         |              |         |              |         |         |              |         |              |         |         |          |            |       |           |          |             |       |          |          |             |       |          |  |
| tumor protein p63 [Homo sapiens], TP63                                                                        | 169234657  | 67.9     | 0.985       | 50      | <b>3.286</b> | 51      | <b>3.744</b> | 51      | 0.87    | <b>3.841</b> | 51      | <b>3.895</b> | 51      | 0.99    | 5.59     | 53.03      | 103   | 7         | 1528.96  | 53.03       | 46    | 6        | 1207.26  | 53.03       | 57    | 6        |  |
| Sin3A-associated protein,18kDa [Homo sapiens], SAP18                                                          | 21410831   | 20.5     | 0.907       | 4       | <b>3.179</b> | 4       | <b>3.161</b> | 4       | 0.90    | <b>3.279</b> | 4       | <b>3.179</b> | 4       | 1.03    | 5.49     | 29.42      | 4     | 2         | 1176.95  | 29.42       | 4     | 2        | 870.59   | 22.60       | 4     | 3        |  |
| Sin3 homolog A, transcription regulator [Homo sapiens], SIN3A                                                 | 187953437  | 140.2    | 0.885       | 41      | <b>3.164</b> | 43      | <b>3.188</b> | 43      | 1.18    | <b>3.170</b> | 43      | <b>2.679</b> | 43      | 0.88    | 5.03     | 41.24      | 111   | 12        | 2046.84  | 39.86       | 42    | 11       | 1440.49  | 41.24       | 69    | 12       |  |
| ataxia telangiectasia mutated kinase [Homo sapiens], ATM                                                      | 2304971    | 335.9    | 0.871       | 7       | <b>3.178</b> | 7       | <b>3.178</b> | 7       | 0.98    | <b>3.170</b> | 7       | <b>3.015</b> | 7       | 1.04    | 4.89     | 63.15      | 1084  | 25        | 20934.27 | 63.15       | 56    | 25       | 11385.00 | 55.06       | 68    | 21       |  |
| PRP40 pre-mRNA processing factor 40 homolog B [Homo sapiens], PRPF40B                                         | 72534686   | 96.6     | 0.991       | 2       | <b>2.951</b> | 2       | <b>2.951</b> | 2       | 0.81    | <b>2.895</b> | 2       | <b>2.912</b> | 2       | 0.99    | 5.96     | 1.73       | 3     | 1         | 38.38    | 1.73        | 1     | 1        | 102.35   | 1.73        | 2     | 1        |  |
| DNA (cytosine-5)-methyltransferase 1 isoform A [Homo sapiens], DNMT1                                          | 195927037  | 179.0    | 1.095       | 13      | <b>2.805</b> | 13      | <b>2.805</b> | 13      | 0.81    | <b>2.833</b> | 13      | <b>2.855</b> | 13      | 1.11    | 6.99     | 15.71      | 35    | 2         | 491.42   | 15.71       | 16    | 2        | 397.99   | 15.71       | 19    | 2        |  |
| ribosomal protein S6 kinase beta-1 [Homo sapiens], RPS6KB1                                                    | 4506737    | 59.4     | 0.979       | 34      | <b>2.717</b> | 34      | <b>2.515</b> | 34      | 0.87    | <b>2.660</b> | 34      | <b>2.589</b> | 34      | 1.18    | 4.88     | 9.68       | 52    | 16        | 1078.04  | 8.51        | 28    | 14       | 524.18   | 5.79        | 24    | 10       |  |
| GRB2-associated protein 2 isoform 2 [Homo sapiens], GAB2                                                      | 6912460    | 73.5     | 1.062       | 4       | <b>2.699</b> | 4       | <b>2.414</b> | 4       | 0.83    | <b>2.444</b> | 4       | <b>2.677</b> | 4       | 0.80    | 9.20     | 9.90       | 6     | 2         | 57.15    | 9.90        | 2     | 2        | 65.47    | 9.90        | 4     | 2        |  |
| nuclear transcription factor Y, beta [Homo sapiens], NFYB                                                     | 5453780    | 25.8     | 1.046       | 10      | <b>2.646</b> | 11      | <b>2.026</b> | 11      | 0.81    | <b>2.533</b> | 11      | <b>2.267</b> | 11      | 1.12    | 7.97     | 15.35      | 16    | 3         | 268.25   | 15.35       | 9     | 3        | 158.16   | 15.35       | 7     | 3        |  |
| cyclin-dependent kinase 2 isoform 1 [Homo sapiens], CDK2                                                      | 16936528   | 33.1     | 0.933       | 7       | <b>2.579</b> | 7       | <b>2.185</b> | 7       | 0.81    | <b>2.530</b> | 7       | <b>2.493</b> | 7       | 0.82    | 7.03     | 51.92      | 22    | 10        | 5402.07  | 51.92       | 11    | 8        | 1829.81  | 49.13       | 10    | 8        |  |
| stratifin [Homo sapiens], SFN                                                                                 | 49456807   | 29.6     | 0.989       | 11      | <b>2.338</b> | 13      | <b>2.260</b> | 13      | 0.83    | <b>2.518</b> | 13      | <b>2.480</b> | 13      | 1.02    | 7.01     | 49.03      | 90    | 18        | 3911.15  | 38.41       | 105   | 13       | 1804.71  | 40.34       | 85    | 15       |  |
| nuclear factor NF-kappa-B p105 subunit isoform 1 [Homo sapiens], NFkB1                                        | 34577122   | 111.7    | 1.160       | 5       | <b>2.302</b> | 5       | <b>2.181</b> | 5       | 0.89    | <b>2.512</b> | 5       | <b>2.033</b> | 5       | 0.83    | 5.29     | 23.94      | 8     | 2         | 194.50   | 23.94       | 3     | 2        | 88.90    | 23.94       | 5     | 2        |  |
| autophagy/bedlin-1 regulator 1 [Homo sapiens], AMBRA1                                                         | 54003827   | 132.4    | 0.963       | 90      | <b>2.186</b> | 92      | <b>2.254</b> | 92      | 0.95    | <b>2.302</b> | 91      | <b>2.207</b> | 92      | 1.13    | 4.91     | 20.80      | 143   | 30        | 2874.58  | 17.79       | 65    | 25       | 1938.48  | 15.76       | 78    | 23       |  |
| CREB-regulated transcription coactivator 1 isoform 1 [Homo sapiens], CRTCI                                    | 148596965  | 67.5     | 0.753       | 6       | <b>2.171</b> | 6       | <b>2.078</b> | 6       | 0.90    | <b>2.242</b> | 6       | <b>2.452</b> | 6       | 1.00    | 8.66     | 3.02       | 12    | 2         | 221.79   | 1.51        | 5     | 1        | 171.19   | 3.02        | 7     | 2        |  |
| homedomain interacting protein kinase 2 [Homo sapiens], HIPK2                                                 | 3164420685 | 122.9    | 0.993       | 9       | <b>2.153</b> | 9       | <b>2.109</b> | 9       | 1.05    | <b>2.449</b> | 9       | <b>2.192</b> | 9       | 0.98    | 9.39     | 21.39      | 17    | 6         | 338.81   | 15.56       | 7     | 4        | 200.46   | 16.39       | 10    | 5        |  |
| DNA damage-inducible transcript 3 [Homo sapiens], DDIT3                                                       | 304282231  | 20.3     | 0.974       | 2       | <b>2.107</b> | 2       | <b>1.971</b> | 2       | 1.00    | <b>2.122</b> | 2       | <b>2.468</b> | 2       | 0.91    | 4.92     | 1.25       | 20    | 3         | 285.28   | 1.00        | 9     | 2        | 198.22   | 1.25        | 11    | 3        |  |
| REST corepressor 1 [Homo sapiens], RRCOR1                                                                     | 119602199  | 54.4     | 1.019       | 9       | <b>2.046</b> | 9       | <b>1.950</b> | 9       | 1.08    | <b>2.010</b> | 9       | <b>2.066</b> | 9       | 1.16    | 5.33     | 28.05      | 18    | 4         | 486.50   | 28.05       | 9     | 4        | 236.61   | 28.05       | 9     | 4        |  |
| E2F transcription factor [Homo sapiens], E2F1                                                                 | 12669911   | 48.6     | 1.014       | 5       | <b>1.991</b> | 5       | <b>2.075</b> | 5       | 0.89    | <b>2.081</b> | 5       | <b>2.011</b> | 5       | 0.99    | 9.27     | 15.69      | 8     | 4         | 165.73   | 15.69       | 4     | 4        | 122.74   | 17.10       | 4     | 3        |  |
| splicing factor 3A subunit 2 [Homo sapiens], SF3A2                                                            | 21361376   | 61.8     | 1.144       | 4       | <b>1.873</b> | 4       | <b>1.758</b> | 4       | 0.85    | <b>1.944</b> | 4       | <b>1.948</b> | 4       | 1.15    | 8.54     | 13.43      | 18    | 5         | 367.22   | 11.51       | 11    | 4        | 116.66   | 8.87        | 7     | 4        |  |
| serine/threonine protein kinase SRPK2 isoform A [Homo sapiens], SRPK2                                         | 33188449   | 76.9     | 0.968       | 1       | <b>1.780</b> | 1       | <b>1.825</b> | 1       | 1.15    | <b>1.724</b> | 1       | <b>1.774</b> | 1       | 1.11    | 6.13     | 3.15       | 2     | 1         | 66.61    | 3.15        | 1     | 1        | 47.84    | 3.15        | 1     | 1        |  |
| RNA-binding protein with serine-rich domain 1 [Homo sapiens], RNPS1                                           | 6857826    | 33.7     | 1.124       | 8       | <b>1.729</b> | 9       | <b>1.696</b> | 9       | 0.86    | <b>1.736</b> | 9       | <b>1.755</b> | 9       | 1.07    | 6.90     | 74.30      | 16    | 13        | 3619.91  | 63.45       | 7     | 2        | 1932.29  | 69.08       | 8     | 2        |  |
| histone-arginine methyltransferase [Homo sapiens], CARM1                                                      | 40288288   | 67.2     | 1.040       | 2       | <b>1.722</b> | 3       | <b>1.676</b> | 3       | 0.90    | <b>1.723</b> | 3       | <b>1.881</b> | 3       | 1.19    | 7.40     | 9.62       | 5     | 2         | 107.28   | 9.62        | 2     | 2        | 80.01    | 9.62        | 3     | 2        |  |
| copper transport protein ATOX1 [Homo sapiens], ATOX1                                                          | 4757804    | 8.4      | 1.018       | 1       | <b>1.713</b> | 1       | <b>1.686</b> | 1       | 0.97    | <b>1.648</b> | 1       | <b>1.742</b> | 1       | 1.00    | 6.62     | 22.65      | 1     | 1         | 504.31   | 18.58       | 1     | 1        | 69.60    | 14.50       | 5     | 5        |  |
| apoptotic chromatin condensation inducer 1 isoform 1 [Homo sapiens], ACIN1                                    | 187954619  | 240.8    | 0.895       | 5       | <b>1.691</b> | 5       | <b>1.701</b> | 5       | 0.85    | <b>1.617</b> | 5       | <b>1.674</b> | 5       | 0.90    | 5.64     | 5.48       | 8     | 3         | 425.91   | 5.48        | 5     | 3        | 64.34    | 5.48        | 3     | 3        |  |
| bcl-2-associated transcription factor 1 isoform 1 [Homo sapiens], BCLAF1                                      | 3661958    | 103.5    | 1.073       | 8       | <b>1.577</b> | 8       | <b>1.547</b> | 8       | 0.82    | <b>1.535</b> | 8       | <b>1.468</b> | 8       | 0.97    | 5.80     | 21.32      | 13    | 6         | 248.79   | 21.32       | 7     | 6        | 122.98   | 17.72       | 6     | 4        |  |
| serine/arginine-rich splicing factor 2 [Homo sapiens], SRSF2                                                  | 306482646  | 24.8     | 1.075       | 6       | <b>1.572</b> | 6       | <b>1.508</b> | 6       | 0.90    | <b>1.463</b> | 6       | <b>1.452</b> | 6       | 1.00    | 8.66     | 3.02       | 12    | 2         | 221.79   | 1.51        | 5     | 1        | 171.19   | 3.02        | 7     | 2        |  |
| DAB2 interacting protein [Homo sapiens], DAB2IP                                                               | 94967023   | 123.3    | 1.188       | 11      | <b>1.450</b> | 11      | <b>1.410</b> | 11      | 0.98    | <b>1.480</b> | 11      | <b>1.469</b> | 11      | 1.07    | 6.89     | 8.23       | 15    | 5         | 245.97   | 8.23        | 7     | 5        | 140.17   | 6.15        | 8     | 4        |  |
| ADP-ribosylation factor 1 [Homo sapiens], ARF1                                                                | 56204828   | 20.7     | 1.093       | 4       | <b>1.427</b> | 4       | <b>1.412</b> | 4       | 1.05    | <b>1.444</b> | 4       | <b>1.395</b> | 4       | 1.11    | 6.80     | 58.56      | 5     | 2         | 2500.40  | 57.66       | 7     | 4        | 1515.64  | 58.56       | 7     | 3        |  |
| growth arrest and DNA-damage-inducible, gamma [Homo sapiens], GADD45G                                         | 55663260   | 17.5     | 1.061       | 1       | <b>1.395</b> | 1       | <b>1.393</b> | 1       | 0.98    | <b>1.355</b> | 1       | <b>1.410</b> | 1       | 0.92    | 6.33     | 3.49       | 3     | 2         | 67.48    | 3.49        | 2     | 2        | 28.90    | 6.48        | 1     | 1        |  |
| guanine nucleotide binding protein (G protein), beta polypeptide 2-like [Homo sapiens], GNB2L1                | 62896535   | 33.6     | 1.099       | 9       | <b>1.373</b> | 9       | <b>1.392</b> | 9       | 1.05    | <b>1.449</b> | 9       | <b>1.492</b> | 9       | 0.98    | 9.39     | 21.39      | 10    | 6         | 338.81   | 15.56       | 7     | 4        | 200.46   | 16.39       | 10    | 5        |  |
| proteasomal ubiquitin receptor ADRM1 precursor [Homo sapiens], ADRM1                                          | 28373194   | 45.9     | 1.082       | 14      | <b>1.349</b> | 15      | <b>1.317</b> | 15      | 0.89    | <b>1.354</b> | 15      | <b>1.307</b> | 14      | 1.04    | 5.81     | 28.99      | 15    | 9         | 520.70   | 23.94       | 12    | 7        | 295.22   | 22.87       | 13    | 7        |  |
| CDK5 and ABL1 enzyme substrate 1 isoform 1 [Homo sapiens], CABLES1                                            | 24308048   | 40.6     | 1.097       | 2       | <b>1.328</b> | 2       | <b>1.327</b> | 2       | 1.00    | <b>1.324</b> | 2       | <b>1.380</b> | 2       | 0.91    | 4.92     | 1.25       | 20    | 3         | 285.28   | 1.00        | 9     | 2        | 198.22   | 1.25        | 11    | 3        |  |
| G1 to S phase transition protein 1 [Homo sapiens], GSP1T                                                      | 119605536  | 71.7     | 1.051       | 1       | <b>1.314</b> | 1       | <b>1.343</b> | 1       | 0.94    | <b>1.280</b> | 1       | <b>1.274</b> | 1       | 1.03    | 5.48     | 8.82       | 2     | 1         | 68.21    | 8.82        | 1     | 1        | 34.84    | 8.82        | 1     | 1        |  |
| CREB binding protein [Homo sapiens], CREBBP                                                                   | 19435893   | 75       | 1.053       | 27      | <b>1.296</b> | 28      | <b>1.246</b> | 28      | 1.01    | <b>1.250</b> | 28      | <b>1.307</b> | 28      | 1.09    | 8.02     | 27.58      | 30    | 9         | 1373.71  | 26.32       | 34    | 8        | 662.01   | 25.47       | 26    | 8        |  |
| ELAV-like protein 1 [Homo sapiens], ELAVL1                                                                    | 38201714   | 37.2     | 1.079       | 8       | <b>1.285</b> | 8       | <b>1.206</b> | 8       | 0.83    | <b>1.275</b> | 8       | <b>1.282</b> | 8       | 1.17    | 8.81     | 19.18      | 16    | 6         | 426.52   | 19.18       | 8     | 6        | 179.91   | 19.18       | 8     | 6        |  |
| Tumor protein 53 [Homo sapiens], TP53                                                                         | 187830777  | 45.8     | 1.084       | 21      | <b>1.270</b> | 21      | <b>1.231</b> | 21      | 0.88    | <b>1.258</b> | 21      | <b>1.202</b> | 21      | 1.11    | 6.98     | 27.53      | 13    | 7         | 579.47   | 25.00       | 14    | 6        | 244.37   | 12.03       | 10    | 4        |  |
| histone deacetylase 6 [Homo sapiens], HDAC6                                                                   | 13128664   | 137.4    | 1.196       | 20      | <b>1.262</b> | 22      | <b>1.376</b> | 22      | 0.95    | <b>1.302</b> | 21      | <b>1.207</b> | 22      | 1.13    | 4.91     | 20.80      | 23    | 10        | 2874.58  | 17.79       | 25    | 15       | 1938.48  | 15.76       | 18    | 23       |  |
| ribosomal protein L11 [Homo sapiens], RPL11                                                                   | 15431290   | 29.5     | 1.127       | 1       | <b>1.260</b> | 1       | <b>1.283</b> | 1       | 0.90    | <b>1.262</b> | 1       | <b>1.286</b> | 1       | 1.07    | 9.28     | 35.37      | 4     | 2         | 148.28   | 35.37       | 3     | 2        | 32.63    | 12.80       | 1     | 1        |  |
| chromatin modifying protein 2B [Homo sapiens], CHMP2B                                                         | 119589274  | 22.4     | 1.021       | 4       | <b>1.257</b> | 4       | <b>1.314</b> | 4       | 0.95    | <b>1.247</b> | 4       | <b>1.319</b> | 4       | 0.94    | 7.09     | 40.45      | 7     | 5         | 1915.50  | 40.45       | 40    | 11       | 774.24   | 37.92       | 2     | 3        |  |
| serine/threonine kinase 11 [Homo sapiens], STK11                                                              | 4507271    | 50.5     | 1.119       | 1       | <b>1.252</b> | 1       | <b>1.312</b> | 1       | 1.02    | <b>1.245</b> | 1       | <b>1.419</b> | 1       | 1.15    | 7.01     | 5.67       | 8     | 3         | 778.98   | 11.42       | 3     | 2        | 28.90    | 6.48        | 1     | 1        |  |
| RNA-binding protein 38 isoform A [Homo sapiens], RBM38                                                        | 34577107   | 25.1     | 1.040       | 2       | <b>1.247</b> | 3       | <b>1.376</b> | 3       | 0.90    | <b>1.244</b> | 3       | <b>1.381</b> | 3       | 1.19    | 7.40     | 9.62       | 5     | 2         | 107.28   | 9.6         |       |          |          |             |       |          |  |

|                                                                        |           |       |       |    |              |    |              |    |      |              |    |              |    |      |      |       |    |    |         |       |    |   |         |       |   |   |
|------------------------------------------------------------------------|-----------|-------|-------|----|--------------|----|--------------|----|------|--------------|----|--------------|----|------|------|-------|----|----|---------|-------|----|---|---------|-------|---|---|
| histone-lysine N-methyltransferase EZH2 isoform b [Homo sapiens], EZH2 | 23510384  | 78.3  | 0.913 | 11 | <b>0.669</b> | 11 | <b>0.653</b> | 11 | 1.02 | <b>0.643</b> | 11 | <b>0.670</b> | 11 | 0.85 | 6.32 | 10.25 | 10 | 8  | 549.55  | 9.21  | 9  | 7 | 215.23  | 8.81  | 9 | 6 |
| steroid regulatory element-binding factor 1 [Homo sapiens], SREBF1     | 66932902  | 149.5 | 0.974 | 2  | <b>0.665</b> | 2  | <b>0.671</b> | 2  | 1.00 | <b>0.644</b> | 2  | <b>0.680</b> | 2  | 0.91 | 4.92 | 1.25  | 2  | 3  | 285.28  | 1.00  | 9  | 2 | 198.62  | 1.25  | 3 | 3 |
| histone deacetylase 1 [Homo sapiens], HDAC1                            | 49456395  | 53.6  | 0.904 | 16 | <b>0.647</b> | 16 | <b>0.650</b> | 16 | 1.16 | <b>0.642</b> | 16 | <b>0.621</b> | 16 | 1.18 | 8.53 | 11.13 | 16 | 11 | 417.44  | 8.40  | 12 | 8 | 143.92  | 6.85  | 9 | 7 |
| autophagy-related protein 3 [Homo sapiens], ATG3                       | 19526773  | 35.8  | 0.910 | 7  | <b>0.630</b> | 7  | <b>0.647</b> | 7  | 0.99 | <b>0.625</b> | 7  | <b>0.647</b> | 7  | 1.05 | 4.74 | 13.06 | 11 | 3  | 257.80  | 9.87  | 6  | 2 | 132.33  | 7.32  | 5 | 2 |
| histone deacetylase 2 [Homo sapiens], HDAC2                            | 71051977  | 62.4  | 0.953 | 7  | <b>0.624</b> | 7  | <b>0.632</b> | 7  | 0.93 | <b>0.637</b> | 7  | <b>0.624</b> | 7  | 1.11 | 6.92 | 10.61 | 13 | 2  | 173.50  | 10.61 | 6  | 2 | 133.63  | 10.61 | 7 | 2 |
| metastasis-associated protein [Homo sapiens], MTA1                     | 115527080 | 79.8  | 0.911 | 3  | <b>0.622</b> | 3  | <b>0.629</b> | 3  | 0.93 | <b>0.624</b> | 3  | <b>0.611</b> | 3  | 1.12 | 6.87 | 24.73 | 2  | 6  | 467.67  | 21.70 | 10 | 5 | 289.05  | 17.31 | 2 | 5 |
| special AT-rich sequence binding protein 2 [Homo sapiens], SATB2       | 289547596 | 80.5  | 0.953 | 6  | <b>0.617</b> | 6  | <b>0.680</b> | 6  | 0.90 | <b>0.646</b> | 6  | <b>0.645</b> | 6  | 1.00 | 8.66 | 3.02  | 12 | 2  | 221.79  | 1.51  | 5  | 1 | 171.19  | 3.02  | 7 | 2 |
| apoptosis-stimulating of p53 protein 1 [Homo sapiens], ASPP1           | 121114287 | 110.0 | 0.914 | 4  | <b>0.427</b> | 4  | <b>0.558</b> | 4  | 0.85 | <b>0.544</b> | 4  | <b>0.484</b> | 4  | 1.15 | 8.54 | 13.43 | 18 | 5  | 367.22  | 11.51 | 11 | 4 | 116.66  | 8.87  | 7 | 4 |
| histone acetyltransferase KAT5 isoform 1 [Homo sapiens], KAT5          | 36287069  | 59.8  | 0.916 | 1  | <b>0.238</b> | 1  | <b>0.241</b> | 1  | 0.83 | <b>0.235</b> | 1  | <b>0.248</b> | 1  | 1.02 | 7.01 | 49.03 | 1  | 1  | 3911.15 | 38.41 | 1  | 1 | 1804.71 | 40.34 | 1 | 1 |

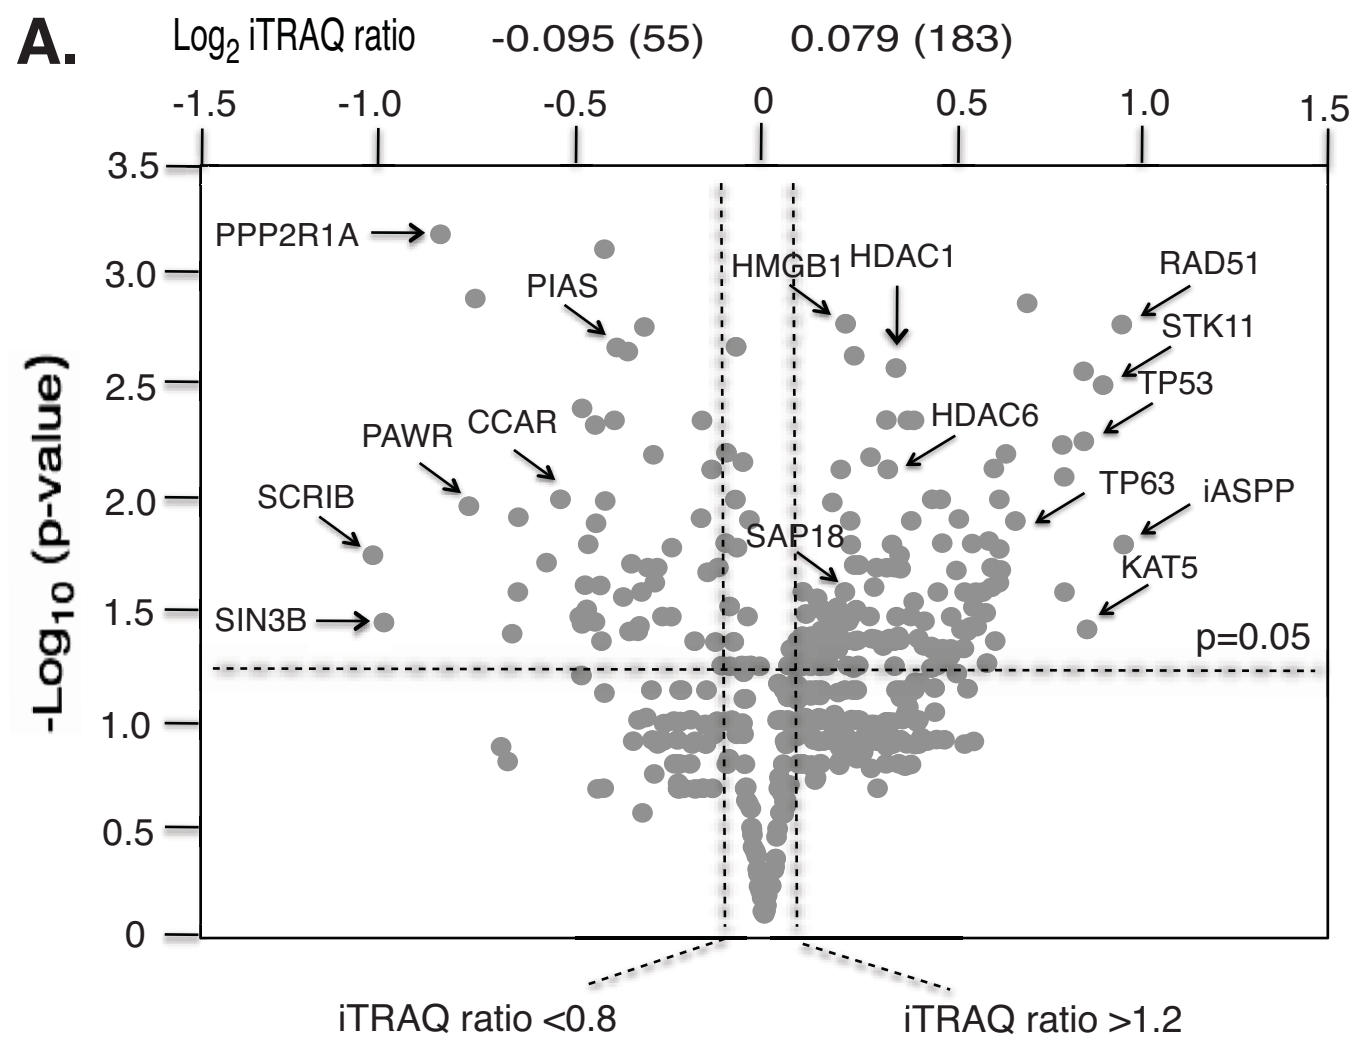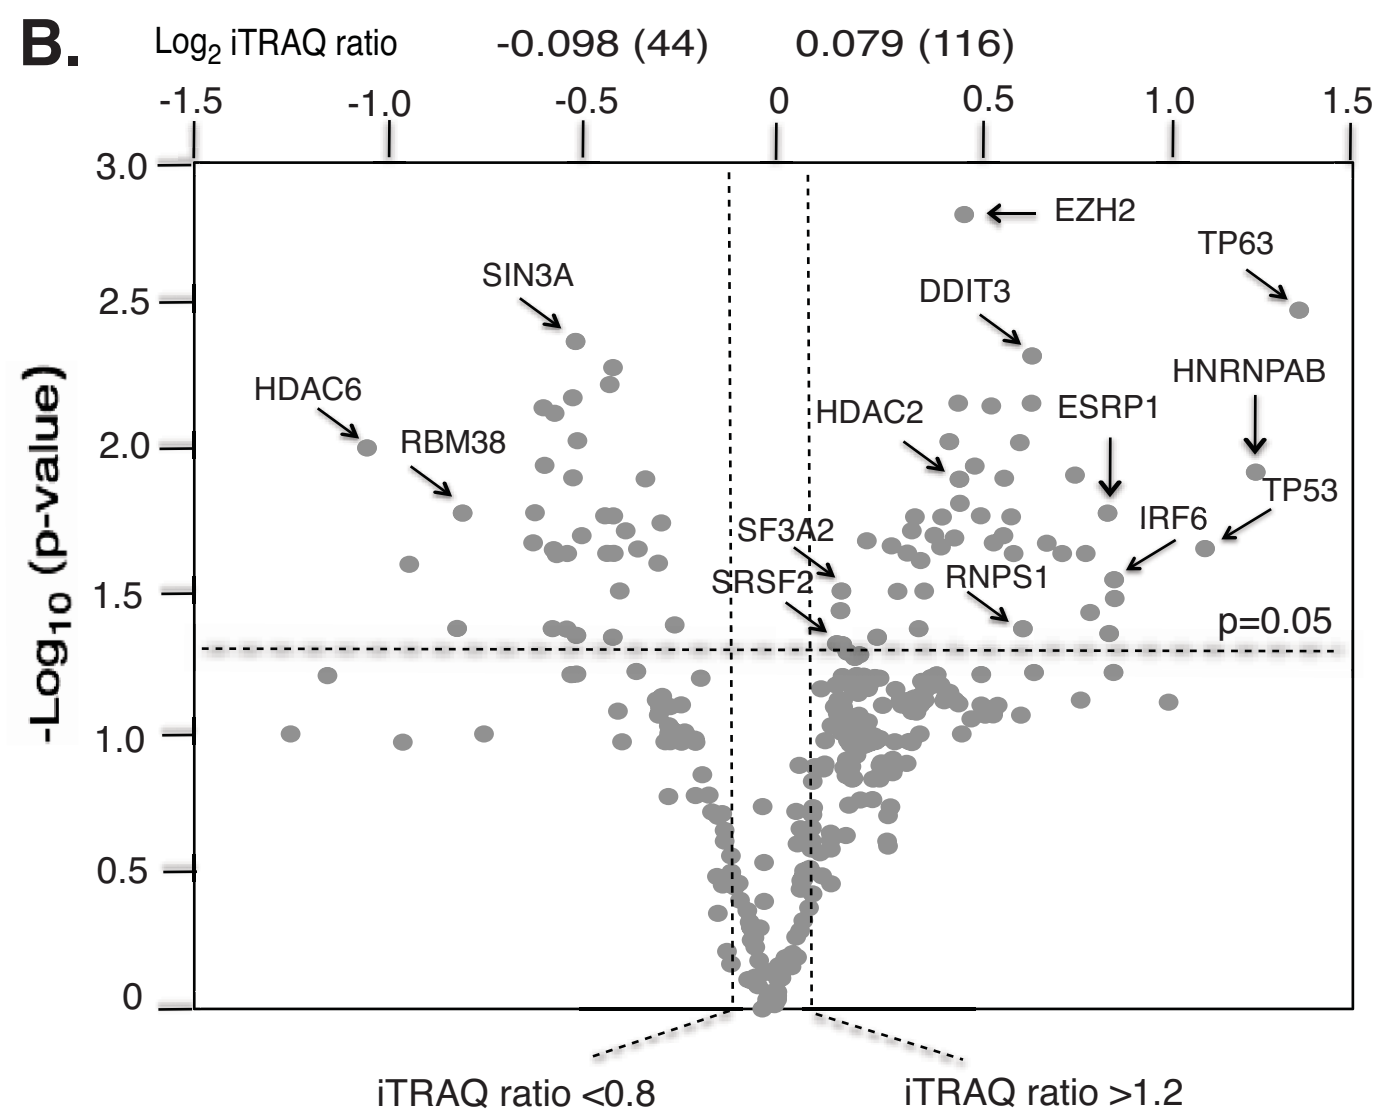

Figure S4

Comparison Analysis: TP53S/R

TP53-S - analysis TP53-R - analysis

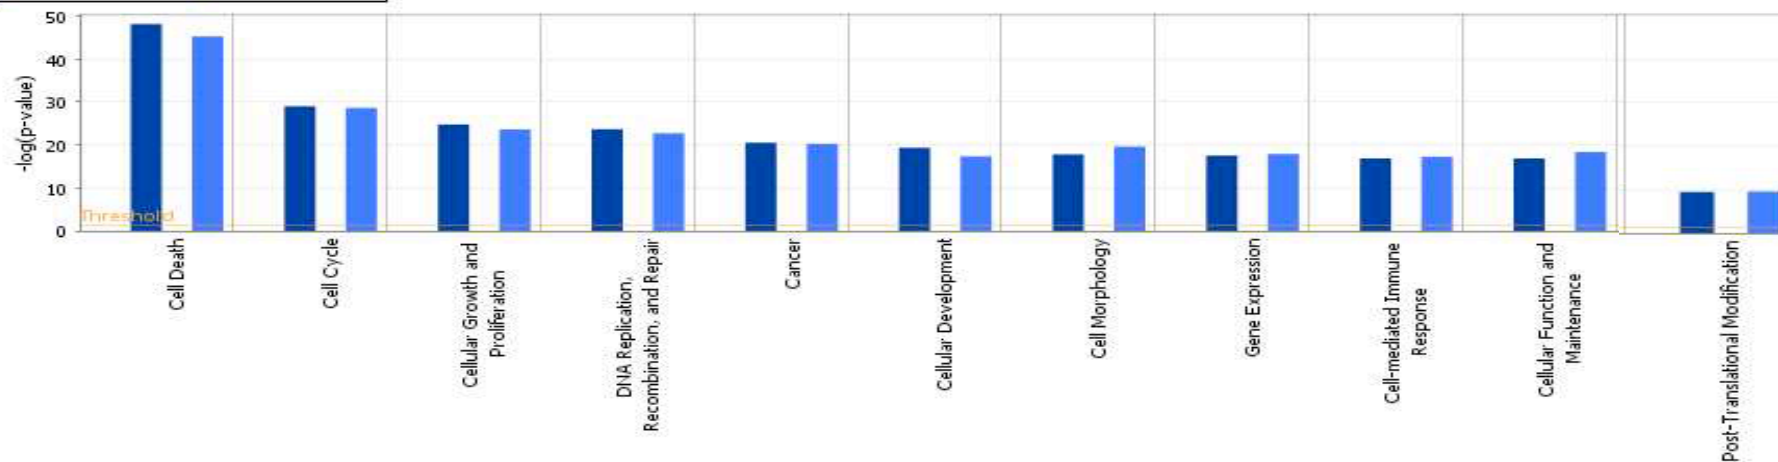

© 2000-2011 Ingenuity Systems, Inc. All rights reserved.

Comparison Analysis: TP53S/R

TP53-S - analysis TP53-R - analysis

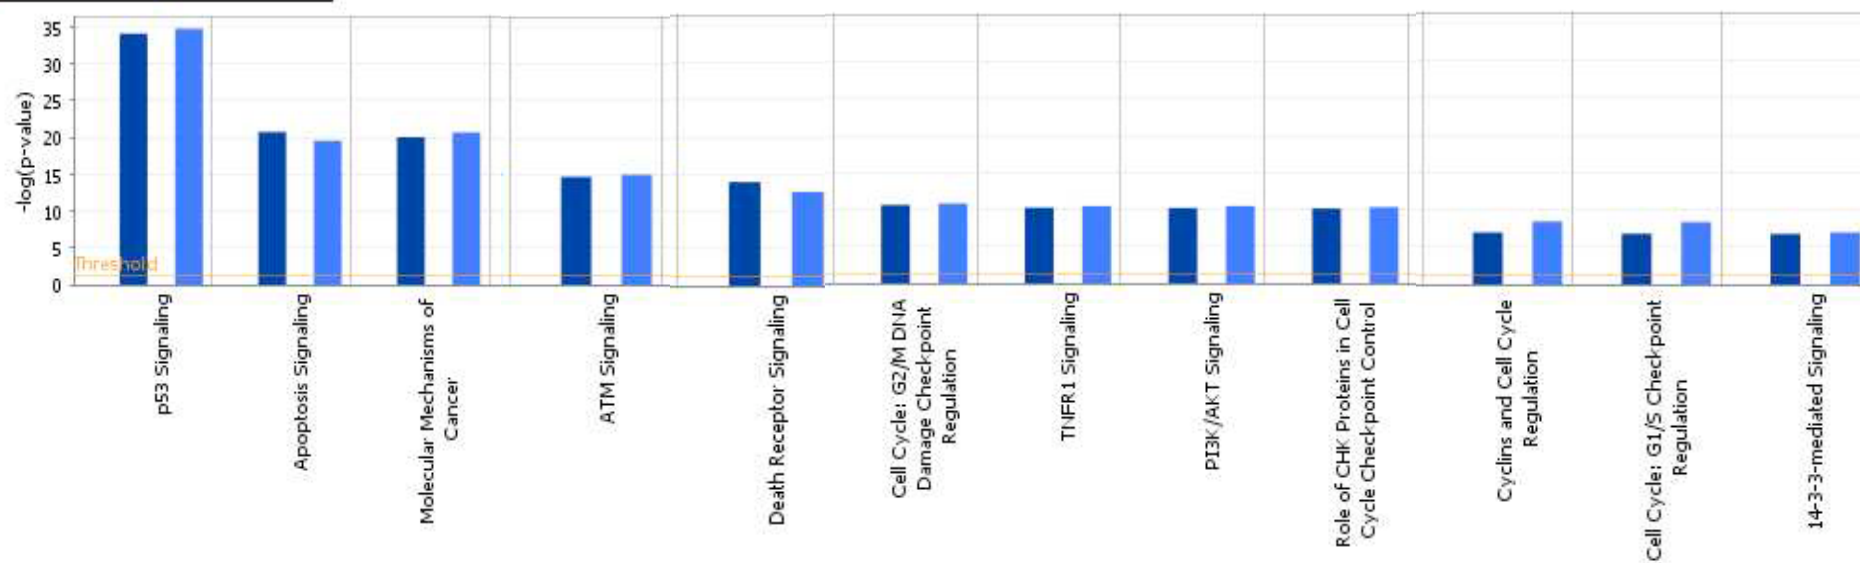

© 2000-2011 Ingenuity Systems, Inc. All rights reserved.

Figure S5

Comparison Analysis: DNp63 S/R

■ DNp63-S - aAnalysis ■ DNp63-R - Analysis

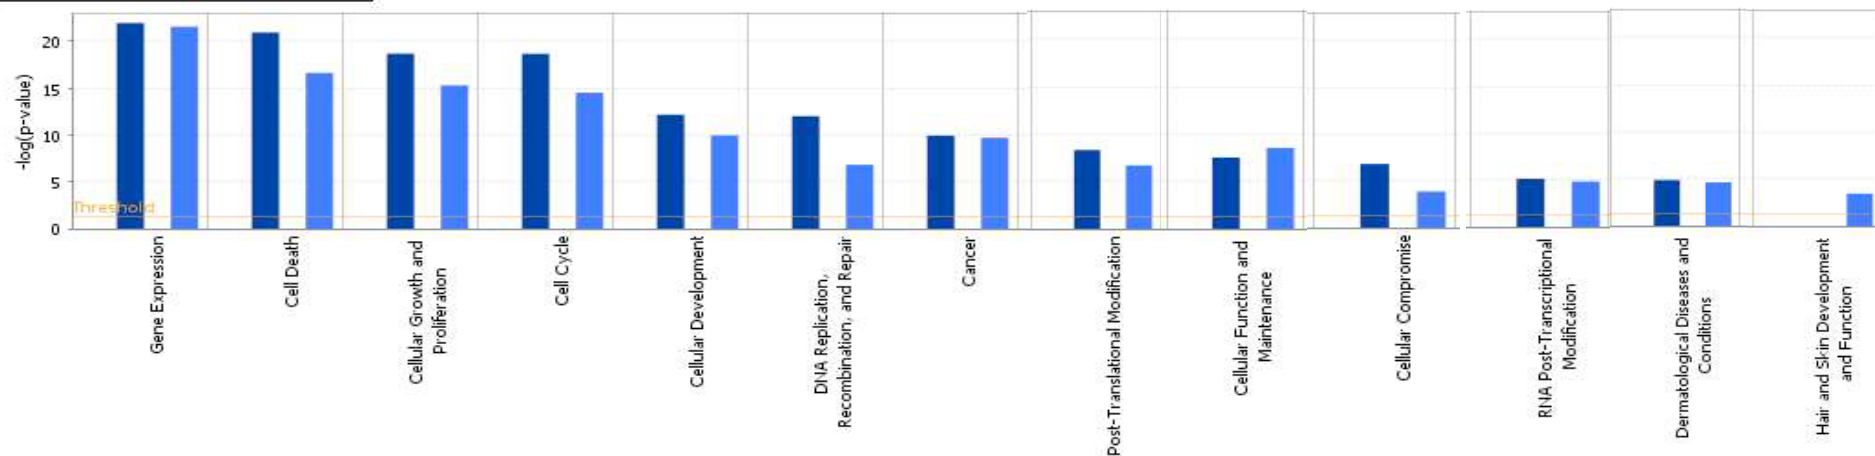

© 2000-2011 Ingenuity Systems, Inc. All rights reserved.

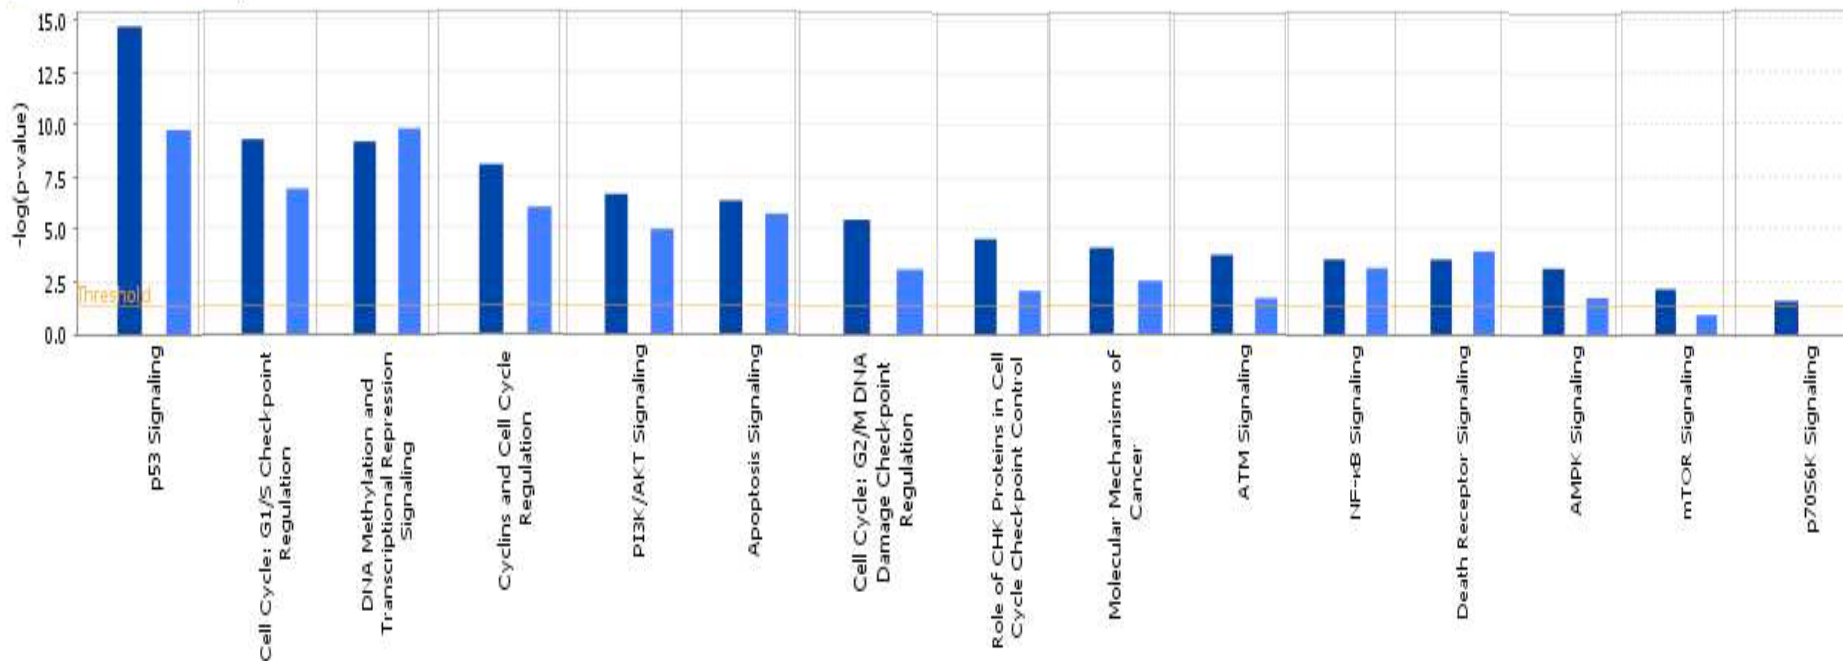

Supplement: cc-11-2367-s01.pdf [file cc-11-2367-s01.pdf]
